# Supplementary material for: Light Quality Dependent Changes in Morphology, Antioxidant Capacity, and Volatile Production in Sweet Basil (Ocimum basilicum)
Source: Front Plant Sci. 2016 Sep 1;7:1328. doi: 10.3389/fpls.2016.01328 (PMC5007804; doi:10.3389/fpls.2016.01328)
Supplement: Supplementary file 1 [file DataSheet2.XLSX]

## Sheet: Table S1
Compound Name	Common Name	SuperClass	Class	SubClass	Formula	CAS
2-​Propenoic acid, 3-​phenyl-​, methyl ester, (2E)​-	Methyl (E)-cinnamate	Benzenoids	Benzene and substituted derivatives	Phenylpropanoids	C10 H10 O2	1754-62-7 (*)
Benzene, 1-​methoxy-​4-​(2-​propen-​1-​yl)​-	Estragole	Benzenoids	Benzene and substituted derivatives	Phenylpropanoids	C10 H12 O	140-67-0 (*)
Phenol, 2-​methoxy-​4-​(2-​propen-​1-​yl)​-	Eugenol	Benzenoids	Benzene and substituted derivatives	Phenylpropanoids	C10 H12 O2	97-53-0 (*)
Benzene, 1,​2-​dimethoxy-​4-​(2-​propen-​1-​yl)​-	Methyl eugenol	Benzenoids	Benzene and substituted derivatives	Phenylpropanoids	C11 H14 O2	93-15-2 (*)
Butanoic acid, methyl ester	methyl butyrate	Lipids and lipid-like molecules	Fatty Acyls	Fatty acid esters	C5 H10 O2	623-42-7 (*)
1-​Butanol, 2-​methyl-	2-methyl-1-butanol	Lipids and lipid-like molecules	Fatty Acyls	Fatty acid esters	C5 H12 O	137-32-6 (*)
Butanoic acid, 2-​methyl-​, methyl ester	methyl 2-methyl butyrate	Lipids and lipid-like molecules	Fatty Acyls	Fatty acid esters	C6 H12 O2	868-57-5 (*)
Butanoic acid, ethyl ester	ethyl butyrate	Lipids and lipid-like molecules	Fatty Acyls	Fatty acid esters	C6 H12 O	105-54-4 (*)
Butanoic acid, 2-​methyl-​, ethyl ester	ethyl 2-methyl butyrate	Lipids and lipid-like molecules	Fatty Acyls	Fatty acid esters	C7 H14 O2	7452-79-1 (*)
Butanoic acid, propyl ester	propyl butyrate	Lipids and lipid-like molecules	Fatty Acyls	Fatty acid esters	C7 H14 O2	105-66-8 (*)
Pentanoic acid, ethyl ester	ethyl valerate	Lipids and lipid-like molecules	Fatty Acyls	Fatty acid esters	C7 H14 O2	539-82-2 (*)
Hexanoic acid, methyl ester	methyl hexanoate	Lipids and lipid-like molecules	Fatty Acyls	Fatty acid esters	C7 H14 O2	106-70-7 (*)
Butanoic acid, 2-​methyl-​, propyl ester	propyl 2-methyl butyrate	Lipids and lipid-like molecules	Fatty Acyls	Fatty acid esters	C8 H16 O2	37064-20-3
Hexanoic acid, ethyl ester	ethyl hexanoate	Lipids and lipid-like molecules	Fatty Acyls	Fatty acid esters	C8 H16 O2	123-66-0 (*)
Hexanoic acid, butyl ester	propyl hexanoate	Lipids and lipid-like molecules	Fatty Acyls	Fatty acid esters	C10 H20 O2	626-77-7 (*)
Hexanoic acid, propyl ester	Butyl hexanoate	Lipids and lipid-like molecules	Fatty Acyls	Fatty acid esters	C9 H18 O2	626-82-4 (*)
1-​Penten-​3-​ol	1-​Penten-​3-​ol	Lipids and lipid-like molecules	Fatty Acyls	Fatty alcohols	C5 H10 O	616-25-1 (*)
3-​Hexen-​1-​ol, (3Z)​-	(Z)-3-hexen-1-ol	Lipids and lipid-like molecules	Fatty Acyls	Fatty alcohols	C6 H12 O	928-96-1 (*)
2-​Hexen-​1-​ol, (2E)​-	(E)-2-hexen-1-ol	Lipids and lipid-like molecules	Fatty Acyls	Fatty alcohols	C6 H12 O	928-95-0 (*)
1-​Hexanol	Hexanol	Lipids and lipid-like molecules	Fatty Acyls	Fatty alcohols	C6 H14 O	111-27-3 (*)
1-​Octen-​3-​ol	1-octen-3-ol	Lipids and lipid-like molecules	Fatty Acyls	Fatty alcohols	C8 H16 O	3391-86-4 (*)
3-​Hexenal	3-​Hexenal	Lipids and lipid-like molecules	Fatty Acyls	Fatty aldehydes	C6 H10 O	4440-65-7 (*)
Hexanal	Hexanal	Lipids and lipid-like molecules	Fatty Acyls	Fatty aldehydes	C6 H12 O	66-25-1 (*)
2-​Hexenal, (2E)​-	(E)-2-hexenal	Lipids and lipid-like molecules	Fatty Acyls	Fatty aldehydes	C6 H10 O	6728-26-3 (*)
Octanal	Octanal	Lipids and lipid-like molecules	Fatty Acyls	Fatty aldehydes	C8 H16 O	124-13-0 (*)
1,​3,​6-​Octatriene, 3,​7-​dimethyl-	beta-ocimene	Lipids and lipid-like molecules	Prenol lipids	Monoterpenoids	C10 H16	13877-91-3 (*)
1,​6-​Octadien-​3-​ol, 3,​7-​dimethyl-	Linalool	Lipids and lipid-like molecules	Prenol lipids	Monoterpenoids	C10 H18 O	78-70-6 (*)
Bicyclo[3.1.1]​hept-​2-​ene, 2,​6,​6-​trimethyl-	alpha-pinene	Lipids and lipid-like molecules	Prenol lipids	Monoterpenoids	C10 H16	80-56-8 (*)
Bicyclo[3.1.1]​heptane, 6,​6-​dimethyl-​2-​methylene-​, (1S,​5S)​-	laevo-beta-pinene	Lipids and lipid-like molecules	Prenol lipids	Monoterpenoids	C10 H16	18172-67-3 (*)
Bicyclo[4.1.0]​hept-​3-​ene, 3,​7,​7-​trimethyl-	delta-3-carene	Lipids and lipid-like molecules	Prenol lipids	Monoterpenoids	C10 H16	13466-78-9 (*)
Bicyclo[3.1.0]hexane, 4-methylene-1-(1-methylethyl)-	sabinene	Lipids and lipid-like molecules	Prenol lipids	Monoterpenoids	C10 H16	3387-41-5 (*)
1,​3-​Cyclohexadiene, 2-​methyl-​5-​(1-​methylethyl)​-	alpha-phellandrene	Lipids and lipid-like molecules	Prenol lipids	Monoterpenoids	C10 H16	99-83-2 (*)
Cyclohexene, 1-​methyl-​4-​(1-​methylethenyl)​-​, (4R)​-	dextro-limonene	Lipids and lipid-like molecules	Prenol lipids	Monoterpenoids	C10 H16	5989-27-5 (*)
3-​Cyclohexene-​1-​methanol, α,​α,​4-​trimethyl-	alpha-terpineol	Lipids and lipid-like molecules	Prenol lipids	Monoterpenoids	C10 H18 O	98-55-5 (*)
2-​Oxabicyclo[2.2.2]​octane, 1,​3,​3-​trimethyl-	1,8-cineole	Lipids and lipid-like molecules	Prenol lipids	Monoterpenoids	C10 H18 O	470-82-6 (*)
3-​Cyclohexen-​1-​ol, 4-​methyl-​1-​(1-​methylethyl)​-​, 1-​acetate	4-terpinenyl acetate	Lipids and lipid-like molecules	Prenol lipids	Monoterpenoids	C12 H20 O2	80-26-2 (**)
2,​4,​6-​Octatriene, 2,​6-​dimethyl-	alloocimene	Lipids and lipid-like molecules	Prenol lipids	Monoterpenoids	C10 H16	673-84-7 (**)
5,​7-​Octadien-​2-​ol, 2,​6-​dimethyl-	Ocimenol	Lipids and lipid-like molecules	Prenol lipids	Monoterpenoids	C10 H18 O	5986-38-9 (**)
Butanoic acid, 2-​methyl-​, hexyl ester	Hexyl 2-methyl butyrate	Lipids and lipid-like molecules	Prenol lipids	Monoterpenoids	C11 H22 O2	10032-15-2 (*)
Azulene, 1,​2,​3,​5,​6,​7,​8,​8a-​octahydro-​1,​4-​dimethyl-​7-​(1-​methylethenyl)​-​, (1S,​7R,​8aS)​-	alpha-bulnesene	Lipids and lipid-like molecules	Prenol lipids	Sesquiterpenoids	C15 H24	3691-11-0 (**)
	alpha-himachalene	Lipids and lipid-like molecules	Prenol lipids	Sesquiterpenoids	C15 H24	3853-83-6 (**)
1H-​Cyclopropa[a]​naphthalene, 1a,​2,​3,​5,​6,​7,​7a,​7b-​octahydro-​1,​1,​7,​7a-​tetramethyl-​, (1aR,​7R,​7aR,​7bS)​-	(+)-calarene	Lipids and lipid-like molecules	Prenol lipids	Sesquiterpenoids	C15 H24	17334-55-3 (**)
Bicyclo[3.1.1]​hept-​2-​ene, 2,​6-​dimethyl-​6-​(4-​methyl-​3-​penten-​1-​yl)​-	alpha-bergamotene	Lipids and lipid-like molecules	Prenol lipids	Sesquiterpenoids	C15 H24	17699-05-7 (**)
1,​6,​10-​Dodecatriene, 7,​11-​dimethyl-​3-​methylene-​, (6Z)​-	(Z)-beta-farnesene	Lipids and lipid-like molecules	Prenol lipids	Sesquiterpenoids	C15 H24	28973-97-9 (**)
1,​4,​8-​Cycloundecatriene, 2,​6,​6,​9-​tetramethyl-​, (1E,​4E,​8E)​-	alpha-humulene	Lipids and lipid-like molecules	Prenol lipids	Sesquiterpenoids	C15 H24	6753-98-6 (**)
Naphthalene, 1,​2,​3,​4,​4a,​5,​6,​7-​octahydro-​4-​methyl-​7-​methylene-​1-​(1-​methylethyl)​-​, (1S,​4R,​4aS)​-	1-Epi-bicyclosesquiphellandrene	Lipids and lipid-like molecules	Prenol lipids	Sesquiterpenoids	C15 H24	54274-73-6 (**)
1H-​Cyclopenta[1,​3]​cyclopropa[1,​2]​benzene, octahydro-​7-​methyl-​3-​methylene-​4-​(1-​methylethyl)​-​, (3aS,​3bR,​4S,​7R,​7aR)​-	beta-cubebene	Lipids and lipid-like molecules	Prenol lipids	Sesquiterpenoids	C15 H24	13744-15-5 (**)
Cyclohexane, 1-​ethenyl-​1-​methyl-​2-​(1-​methylethenyl)​-​4-​(1-​methylethylidene)​-	gamma-elemene	Lipids and lipid-like molecules	Prenol lipids	Sesquiterpenoids	C15 H24	3242-08-8 (**)
Naphthalene, 1,​2,​3,​4,​4a,​5,​6,​8a-​octahydro-​7-​methyl-​4-​methylene-​1-​(1-​methylethyl)​-​, (1R,​4aR,​8aS)​-​rel-	gamma-muurolene	Lipids and lipid-like molecules	Prenol lipids	Sesquiterpenoids	C15 H24	30021-74-0 (**)
Naphthalene, 1,​2,​3,​5,​6,​8a-​hexahydro-​4,​7-​dimethyl-​1-​(1-​methylethyl)​-​, (1S,​8aR)​-	delta-cadinene	Lipids and lipid-like molecules	Prenol lipids	Sesquiterpenoids	C15 H24	483-76-1 (**)
Bicyclo[7.2.0]​undec-​4-​ene, 4,​11,​11-​trimethyl-​8-​methylene-​, (1R,​4E,​9S)​-	beta-caryophyllene	Lipids and lipid-like molecules	Prenol lipids	Sesquiterpenoids	C15 H24	87-44-5 (*)
Naphthalene, 1,​2,​3,​4,​4a,​5,​6,​8a-​octahydro-​7-​methyl-​4-​methylene-​1-​(1-​methylethyl)​-​, (1R,​4aS,​8aS)​-​rel-	(R)-gamma-cadinene	Lipids and lipid-like molecules	Prenol lipids	Sesquiterpenoids	C15 H24	39029-41-9 (**)
Naphthalene, 1,​2,​3,​4-​tetrahydro-​1,​6-​dimethyl-​4-​(1-​methylethyl)​-​, (1S,​4S)​-	calamenene	Lipids and lipid-like molecules	Prenol lipids	Sesquiterpenoids	C15 H22	483-77-2 (**)
Propanoic acid, ethyl ester	ethyl propionate	Organic acids and derivatives	Carboxylic acids and derivatives	Carboxylic acid esters	C5 H10 O2	105-37-3 (*)
Acetic acid, propyl ester	propyl acetate	Organic acids and derivatives	Carboxylic acids and derivatives	Carboxylic acid esters	C5 H10 O2	109-60-4 (*)
Propanoic acid, 2-​methyl-​, ethyl ester	ethyl isobutyrate	Organic acids and derivatives	Carboxylic acids and derivatives	Carboxylic acid esters	C6 H12 O2	97-62-1 (*)
Acetic acid, 2-​methylpropyl ester	isobutyl acetate	Organic acids and derivatives	Carboxylic acids and derivatives	Carboxylic acid esters	C6 H12 O2	110-19-0 (*)
Acetic acid, butyl ester	butyl acetate	Organic acids and derivatives	Carboxylic acids and derivatives	Carboxylic acid esters	C6 H12 O2	123-86-4 (*)
1-​Butanol, 2-​methyl-​, 1-​acetate	2-methyl butyl acetate	Organic acids and derivatives	Carboxylic acids and derivatives	Carboxylic acid esters	C7 H14 O2	624-41-9 (*)
Propanoic acid, butyl ester	butyl propionate	Organic acids and derivatives	Carboxylic acids and derivatives	Carboxylic acid esters	C7 H14 O2	590-01-2
Acetic acid, pentyl ester	amyl acetate	Organic acids and derivatives	Carboxylic acids and derivatives	Carboxylic acid esters	C7 H14 O2	628-63-7 (*)
Acetic acid, hexyl ester	hexyl acetate	Organic acids and derivatives	Carboxylic acids and derivatives	Carboxylic acid esters	C8 H16 O2	142-92-7 (*)
* identified by comparison of spectra with NIST 11 database and confirmed by comparison of retention times with authentic standards
** identified by comparison with NIST 11 database and found in Ocimum spp. in literature

## Sheet: Table S2
Wilcoxon-Mann-Whitney test for volatile classes production across the age of development
		Median					Fold Change										p-value										q-value (
Age of development		2	3	4	5	6	3/2	4/2	5/2	6/2	4/3	5/3	6/3	5/4	6/4	6/5	2 vs 3	3 vs 4	4 vs 5	5 vs 6	3 vs 4	3 vs 5	3 vs 6	4 vs 5	4 vs 6	5 v 6	2 vs 3	3 vs 4	4 vs 5	5 vs 6	3 vs 4	3 vs 5	3 vs 6	4 vs 5	4 vs 6	5 v 6
Volatile Class
Carboxylic acid esters		16.2	37	1460000	3630	4720	2.28395	90123.5	224.074	291.358	39459.5	98.1081	127.568	0.0024863	0.00323288	1.30028	0.126631	0.0495346	0.0495346	0.0495346	0.0495346	0.0495346	0.0495346	0.0495346	0.0495346	0.275234	0.158288	0.0651771	0.0651771	0.0651771	0.0651771	0.0651771	0.0651771	0.0651771	0.0651771	0.327659
Fatty acyls		893	909	1660000	1090000	1510000	1.01792	1858.9	1220.6	1690.93	1826.18	1199.12	1661.17	0.656627	0.909639	1.38532	0.827259	0.0495346	0.0495346	0.0495346	0.0495346	0.0495346	0.0495346	0.512691	0.827259	0.0495346	0.827259	0.0651771	0.0651771	0.0651771	0.0651771	0.0651771	0.0651771	0.534053	0.827259	0.0651771
Monoterpenoids		22100	33300	31300000	26100000	47200000	1.50679	1416.29	1181	2135.75	939.94	783.784	1417.42	0.833866	1.50799	1.80843	0.512691	0.0495346	0.0495346	0.0495346	0.0495346	0.0495346	0.0495346	0.512691	0.0495346	0.0495346	0.534053	0.0651771	0.0651771	0.0651771	0.0651771	0.0651771	0.0651771	0.534053	0.0651771	0.0651771
Phenylpropanoids		226000	303000	62400000	14500000	8860000	1.34071	276.106	64.1593	39.2035	205.941	47.8548	29.2409	0.232372	0.141987	0.611034	0.512691	0.0495346	0.0495346	0.0495346	0.0495346	0.0495346	0.0495346	0.0495346	0.0495346	0.12663	0.534053	0.0651771	0.0651771	0.0651771	0.0651771	0.0651771	0.0651771	0.0651771	0.0651771	0.158288
Sesquiterpenoids		58600	104000	35500000	14200000	28700000	1.77474	605.802	242.321	489.761	341.346	136.538	275.962	0.4	0.808451	2.02113	0.512691	0.0495346	0.0495346	0.0495346	0.0495346	0.0495346	0.0495346	0.275234	0.512691	0.0495346	0.534053	0.0651771	0.0651771	0.0651771	0.0651771	0.0651771	0.0651771	0.327659	0.534053	0.0651771
Wilcoxon-Mann-Whitney test for individual volatiles production across the age of development
		Median					Fold Change										p-value										q-value
Age of development		2	3	4	5	6	3/2	4/2	5/2	6/2	4/3	5/3	6/3	5/4	6/4	6/5	2 vs 3	3 vs 4	4 vs 5	5 vs 6	3 vs 4	3 vs 5	3 vs 6	4 vs 5	4 vs 6	5 v 6	2 vs 3	3 vs 4	4 vs 5	5 vs 6	3 vs 4	3 vs 5	3 vs 6	4 vs 5	4 vs 6	5 v 6
Class	CAS
Sesquiterpenoids	13744-15-5	4066.77	6717.12	3.33069e+06	1.40876e+06	3.37925e+06	1.65171	819	346.408	830.942	495.85	209.727	503.08	0.422965	1.01458	2.39873	0.512691	0.0495346	0.0495346	0.0495346	0.0495346	0.0495346	0.0495346	0.512691	0.275234	0.0495346	0.000494949	6.43827e-05	6.43827e-05	6.43827e-05	6.43827e-05	6.43827e-05	6.43827e-05	0.000494949	0.000316785	6.43827e-05
Sesquiterpenoids	17334-55-3	388.669	840.577	289126	179192	496101	2.16271	743.888	461.041	1276.41	343.962	213.178	590.191	0.619772	1.71586	2.76854	0.512691	0.0495346	0.0495346	0.0495346	0.0495346	0.0495346	0.0495346	0.512691	0.0495346	0.0495346	0.000494949	6.43827e-05	6.43827e-05	6.43827e-05	6.43827e-05	6.43827e-05	6.43827e-05	0.000494949	6.43827e-05	6.43827e-05
Sesquiterpenoids	17699-05-7	37919.5	62073.8	2.0539e+07	8.57369e+06	1.45571e+07	1.63699	541.648	226.102	383.895	330.88	138.121	234.513	0.417435	0.708755	1.69788	0.275234	0.0495346	0.0495346	0.0495346	0.0495346	0.0495346	0.0495346	0.275234	0.512691	0.0495346	0.000316785	6.43827e-05	6.43827e-05	6.43827e-05	6.43827e-05	6.43827e-05	6.43827e-05	0.000316785	0.000494949	6.43827e-05
Sesquiterpenoids	28973-97-9	5709.34	11668.3	2.75389e+06	1.05818e+06	1.13279e+06	2.04372	482.348	185.342	198.41	236.014	90.6886	97.0826	0.38425	0.411342	1.07051	0.512691	0.0495346	0.0495346	0.0495346	0.0495346	0.0495346	0.0495346	0.275234	0.512691	0.275234	0.000494949	6.43827e-05	6.43827e-05	6.43827e-05	6.43827e-05	6.43827e-05	6.43827e-05	0.000316785	0.000494949	0.000316785
Sesquiterpenoids	30021-74-0	1118.52	2556.59	1.8608e+06	707789	2.98825e+06	2.28569	1663.63	632.791	2671.61	727.845	276.849	1168.84	0.380369	1.6059	4.22195	0.275234	0.0495346	0.0495346	0.0495346	0.0495346	0.0495346	0.0495346	0.512691	0.0495346	0.0495346	0.000316785	6.43827e-05	6.43827e-05	6.43827e-05	6.43827e-05	6.43827e-05	6.43827e-05	0.000494949	6.43827e-05	6.43827e-05
Sesquiterpenoids	3242-8-8	133.589	514.622	612620	293497	619131	3.85229	4585.87	2197.02	4634.61	1190.43	570.316	1203.08	0.479086	1.01063	2.1095	0.0495346	0.0495346	0.0495346	0.0495346	0.0495346	0.0495346	0.0495346	0.512691	0.275234	0.0495346	6.43827e-05	6.43827e-05	6.43827e-05	6.43827e-05	6.43827e-05	6.43827e-05	6.43827e-05	0.000494949	0.000316785	6.43827e-05
Sesquiterpenoids	3691-11-0	101.506	617.1	374417	180471	544768	6.07945	3688.62	1777.94	5366.85	606.735	292.45	882.786	0.482007	1.45498	3.01858	0.0495346	0.0495346	0.0495346	0.0495346	0.0495346	0.0495346	0.0495346	0.512691	0.0495346	0.0495346	6.43827e-05	6.43827e-05	6.43827e-05	6.43827e-05	6.43827e-05	6.43827e-05	6.43827e-05	0.000494949	6.43827e-05	6.43827e-05
Sesquiterpenoids	3853-83-6	255.796	484.844	115074	42073.7	95522	1.89543	449.864	164.481	373.43	237.342	86.7779	197.016	0.365624	0.830094	2.27035	0.512691	0.0495346	0.0495346	0.0495346	0.0495346	0.0495346	0.0495346	0.275234	0.512691	0.0495346	0.000494949	6.43827e-05	6.43827e-05	6.43827e-05	6.43827e-05	6.43827e-05	6.43827e-05	0.000316785	0.000494949	6.43827e-05
Sesquiterpenoids	39029-41-9	1120.75	2558.57	1.90735e+06	707205	3.00051e+06	2.28291	1701.85	631.011	2677.24	745.474	276.406	1172.73	0.370779	1.57313	4.24277	0.275234	0.0495346	0.0495346	0.0495346	0.0495346	0.0495346	0.0495346	0.512691	0.0495346	0.0495346	0.000316785	6.43827e-05	6.43827e-05	6.43827e-05	6.43827e-05	6.43827e-05	6.43827e-05	0.000494949	6.43827e-05	6.43827e-05
Sesquiterpenoids	483-76-1	69.7647	125.542	25885	8846.39	34700.8	1.79951	371.032	126.803	497.398	206.185	70.4653	276.407	0.341758	1.34058	3.9226	0.275234	0.0495346	0.0495346	0.0495346	0.0495346	0.0495346	0.0495346	0.12663	0.0495346	0.0495346	0.000316785	6.43827e-05	6.43827e-05	6.43827e-05	6.43827e-05	6.43827e-05	6.43827e-05	0.000153019	6.43827e-05	6.43827e-05
Sesquiterpenoids	483-77-2	84.0469	213.17	61328.6	41173.5	155717	2.53632	729.695	489.887	1852.74	287.698	193.148	730.481	0.671358	2.53906	3.78197	0.12663	0.0495346	0.0495346	0.0495346	0.0495346	0.0495346	0.0495346	0.827259	0.0495346	0.0495346	0.000153019	6.43827e-05	6.43827e-05	6.43827e-05	6.43827e-05	6.43827e-05	6.43827e-05	0.000770708	6.43827e-05	6.43827e-05
Sesquiterpenoids	54274-73-6	181.451	668.665	380634	201214	863616	3.6851	2097.72	1108.91	4759.5	569.244	300.918	1291.55	0.528628	2.26889	4.29203	0.0495346	0.0495346	0.0495346	0.0495346	0.0495346	0.0495346	0.0495346	0.512691	0.0495346	0.0495346	6.43827e-05	6.43827e-05	6.43827e-05	6.43827e-05	6.43827e-05	6.43827e-05	6.43827e-05	0.000494949	6.43827e-05	6.43827e-05
Sesquiterpenoids	6753-98-6	6548.51	14168.9	1.96202e+06	614726	626628	2.16369	299.613	93.8727	95.6901	138.474	43.3855	44.2255	0.313313	0.319379	1.01936	0.512691	0.0495346	0.0495346	0.0495346	0.0495346	0.0495346	0.0495346	0.12663	0.275234	0.512691	0.000494949	6.43827e-05	6.43827e-05	6.43827e-05	6.43827e-05	6.43827e-05	6.43827e-05	0.000153019	0.000316785	0.000494949
Sesquiterpenoids	87-44-5	943.379	1377.01	427046	187308	407099	1.45966	452.677	198.551	431.533	310.126	136.026	295.64	0.438615	0.953291	2.17341	0.512691	0.0495346	0.0495346	0.0495346	0.0495346	0.0495346	0.0495346	0.275234	0.512691	0.0495346	0.000494949	6.43827e-05	6.43827e-05	6.43827e-05	6.43827e-05	6.43827e-05	6.43827e-05	0.000316785	0.000494949	6.43827e-05
Phenylpropanoids	140-67-0	782.652	2156.82	148649	91813.3	3653.41	2.75579	189.929	117.311	4.66799	68.9202	42.5688	1.69388	0.617654	0.0245775	0.0397917	0.512691	0.0495346	0.0495346	0.275234	0.0495346	0.0495346	0.0495346	0.275234	0.0495346	0.0495346	0.000494949	6.43827e-05	6.43827e-05	0.000316785	6.43827e-05	6.43827e-05	6.43827e-05	0.000316785	6.43827e-05	6.43827e-05
Phenylpropanoids	1754-62-7	627.97	348.924	214720	10801.2	23704.5	0.555637	341.927	17.2002	37.7478	615.377	30.9558	67.9361	0.0503038	0.110397	2.19461	0.0495346	0.0495346	0.0495346	0.0495346	0.0495346	0.0495346	0.0495346	0.0495346	0.0495346	0.512691	6.43827e-05	6.43827e-05	6.43827e-05	6.43827e-05	6.43827e-05	6.43827e-05	6.43827e-05	6.43827e-05	6.43827e-05	0.000494949
Phenylpropanoids	93-15-2	221191	298905	6.16397e+07	1.43547e+07	1.93986e+06	1.35134	278.672	64.8973	8.77006	206.219	48.0243	6.48989	0.23288	0.0314709	0.135138	0.512691	0.0495346	0.0495346	0.0495346	0.0495346	0.0495346	0.0495346	0.0495346	0.0495346	0.0495346	0.000494949	6.43827e-05	6.43827e-05	6.43827e-05	6.43827e-05	6.43827e-05	6.43827e-05	6.43827e-05	6.43827e-05	6.43827e-05
Phenylpropanoids	97-53-0	3443.74	832.973	388238	112947	6.8885e+06	0.24188	112.737	32.7979	2000.3	466.087	135.595	8269.77	0.290923	17.743	60.9886	0.0495346	0.0495346	0.0495346	0.0495346	0.0495346	0.0495346	0.0495346	0.827259	0.0495346	0.0495346	6.43827e-05	6.43827e-05	6.43827e-05	6.43827e-05	6.43827e-05	6.43827e-05	6.43827e-05	0.000770708	6.43827e-05	6.43827e-05
NA	272-16-2	4514.16	6133.99	64101.2	27917	37093.9	1.35883	14.2	6.18433	8.21723	10.4502	4.5512	6.04726	0.435515	0.578677	1.32872	0.512691	0.0495346	0.0495346	0.0495346	0.0495346	0.0495346	0.0495346	0.0495346	0.0495346	0.0495346	0.000494949	6.43827e-05	6.43827e-05	6.43827e-05	6.43827e-05	6.43827e-05	6.43827e-05	6.43827e-05	6.43827e-05	6.43827e-05
Monoterpenoids	10032-15-2	0	0	40369.2	6904.42	17122.5	#DIV/0!	#DIV/0!	#DIV/0!	#DIV/0!	#DIV/0!	#DIV/0!	#DIV/0!	0.171032	0.424147	2.47993	NA	0.036904	0.036904	0.036904	0.036904	0.036904	0.036904	0.0495346	0.0495346	0.0495346	NA	6.43827e-05	6.43827e-05	6.43827e-05	6.43827e-05	6.43827e-05	6.43827e-05	6.43827e-05	6.43827e-05	6.43827e-05
Monoterpenoids	13466-78-9	664.446	393.841	150909	66422.3	22412.4	0.592735	227.119	99.9664	33.7309	383.172	168.653	56.9072	0.440149	0.148516	0.337422	0.12663	0.0495346	0.0495346	0.0495346	0.0495346	0.0495346	0.0495346	0.512691	0.12663	0.512691	0.000153019	6.43827e-05	6.43827e-05	6.43827e-05	6.43827e-05	6.43827e-05	6.43827e-05	0.000494949	0.000153019	0.000494949
Monoterpenoids	13877-91-3	5062.14	7832.72	7.42744e+06	5.15548e+06	6.53513e+06	1.54731	1467.25	1018.44	1290.98	948.258	658.198	834.338	0.694112	0.879864	1.26761	0.275234	0.0495346	0.0495346	0.0495346	0.0495346	0.0495346	0.0495346	0.512691	0.512691	0.0495346	0.000316785	6.43827e-05	6.43827e-05	6.43827e-05	6.43827e-05	6.43827e-05	6.43827e-05	0.000494949	0.000494949	6.43827e-05
Monoterpenoids	18172-67-3	1960.56	3339.97	3.23954e+06	2.13543e+06	3.22301e+06	1.70358	1652.35	1089.2	1643.92	969.931	639.358	964.983	0.659179	0.994899	1.5093	0.512691	0.0495346	0.0495346	0.0495346	0.0495346	0.0495346	0.0495346	0.827259	0.827259	0.275234	0.000494949	6.43827e-05	6.43827e-05	6.43827e-05	6.43827e-05	6.43827e-05	6.43827e-05	0.000770708	0.000770708	0.000316785
Monoterpenoids	470-82-6	10494	15232.8	9.51625e+06	5.22104e+06	6.92075e+06	1.45158	906.83	497.527	659.497	624.721	342.75	454.332	0.548645	0.727256	1.32555	0.512691	0.0495346	0.0495346	0.0495346	0.0495346	0.0495346	0.0495346	0.512691	0.512691	0.0495346	0.000494949	6.43827e-05	6.43827e-05	6.43827e-05	6.43827e-05	6.43827e-05	6.43827e-05	0.000494949	0.000494949	6.43827e-05
Monoterpenoids	4821-4-9	271.545	269.738	278577	156036	238645	0.993344	1025.89	574.622	878.841	1032.77	578.472	884.73	0.560118	0.856659	1.52943	0.512691	0.0495346	0.0495346	0.0495346	0.0495346	0.0495346	0.0495346	0.512691	0.827259	0.0495346	0.000494949	6.43827e-05	6.43827e-05	6.43827e-05	6.43827e-05	6.43827e-05	6.43827e-05	0.000494949	0.000770708	6.43827e-05
Monoterpenoids	3387-41-5	1146.68	1931.73	1.65036e+06	1.30751e+06	1.88124e+06	1.68463	1439.26	1140.26	1640.6	854.343	676.86	973.861	0.792258	1.1399	1.43879	0.512691	0.0495346	0.0495346	0.0495346	0.0495346	0.0495346	0.0495346	0.827259	0.512691	0.512691	0.000494949	6.43827e-05	6.43827e-05	6.43827e-05	6.43827e-05	6.43827e-05	6.43827e-05	0.000770708	0.000494949	0.000494949
Monoterpenoids	5986-38-9	174.915	238.762	64277.8	39052.6	61294	1.36502	367.479	223.266	350.421	269.212	163.563	256.716	0.607561	0.953581	1.56952	0.512691	0.0495346	0.0495346	0.0495346	0.0495346	0.0495346	0.0495346	0.512691	0.827259	0.0495346	0.000494949	6.43827e-05	6.43827e-05	6.43827e-05	6.43827e-05	6.43827e-05	6.43827e-05	0.000494949	0.000770708	6.43827e-05
Monoterpenoids	5989-27-5	398.607	480.577	314609	294646	337042	1.20564	789.27	739.188	845.548	654.648	613.108	701.326	0.936546	1.0713	1.14389	0.512691	0.0495346	0.0495346	0.0495346	0.0495346	0.0495346	0.0495346	0.827259	0.512691	0.12663	0.000494949	6.43827e-05	6.43827e-05	6.43827e-05	6.43827e-05	6.43827e-05	6.43827e-05	0.000770708	0.000494949	0.000153019
Monoterpenoids	673-84-7	1218.63	813.879	296080	124026	58159	0.667865	242.962	101.775	47.725	363.789	152.389	71.459	0.418894	0.19643	0.468925	0.275234	0.0495346	0.0495346	0.0495346	0.0495346	0.0495346	0.0495346	0.512691	0.12663	0.512691	0.000316785	6.43827e-05	6.43827e-05	6.43827e-05	6.43827e-05	6.43827e-05	6.43827e-05	0.000494949	0.000153019	0.000494949
Monoterpenoids	78-70-6	167.626	643.061	3.83824e+06	8.35369e+06	2.86126e+07	3.83629	22897.7	49835.4	170693	5968.71	12990.5	44494.4	2.17644	7.45461	3.42514	0.512691	0.0495346	0.0495346	0.0495346	0.0495346	0.0495346	0.0495346	0.0495346	0.0495346	0.0495346	0.000494949	6.43827e-05	6.43827e-05	6.43827e-05	6.43827e-05	6.43827e-05	6.43827e-05	6.43827e-05	6.43827e-05	6.43827e-05
Monoterpenoids	80-56-8	966.046	1243.08	1.17503e+06	664102	1.13608e+06	1.28677	1216.32	687.444	1176.01	945.256	534.241	913.93	0.565182	0.966859	1.7107	0.512691	0.0495346	0.0495346	0.0495346	0.0495346	0.0495346	0.0495346	0.827259	0.827259	0.512691	0.000494949	6.43827e-05	6.43827e-05	6.43827e-05	6.43827e-05	6.43827e-05	6.43827e-05	0.000770708	0.000770708	0.000494949
Monoterpenoids	98-55-5	1125.7	1466.42	345096	181934	319555	1.30268	306.562	161.619	283.873	235.332	124.066	217.914	0.527197	0.925988	1.75643	0.512691	0.0495346	0.0495346	0.0495346	0.0495346	0.0495346	0.0495346	0.512691	0.827259	0.0495346	0.000494949	6.43827e-05	6.43827e-05	6.43827e-05	6.43827e-05	6.43827e-05	6.43827e-05	0.000494949	0.000770708	6.43827e-05
Monoterpenoids	99-83-2	100.642	78.4545	50461.5	28384.7	30640.7	0.779544	501.398	282.038	304.454	643.194	361.799	390.554	0.562503	0.60721	1.07948	0.275234	0.0495346	0.0495346	0.0495346	0.0495346	0.0495346	0.0495346	0.512691	0.512691	0.275234	0.000316785	6.43827e-05	6.43827e-05	6.43827e-05	6.43827e-05	6.43827e-05	6.43827e-05	0.000494949	0.000494949	0.000316785
Fatty aldehydes	124-13-0	42.9016	45.7404	11010.9	1974.57	4811.99	1.06617	256.655	46.0255	112.163	240.726	43.169	105.202	0.179328	0.437021	2.43698	0.827259	0.0495346	0.0495346	0.0495346	0.0495346	0.0495346	0.0495346	0.0495346	0.0495346	0.0495346	0.000770708	6.43827e-05	6.43827e-05	6.43827e-05	6.43827e-05	6.43827e-05	6.43827e-05	6.43827e-05	6.43827e-05	6.43827e-05
Fatty aldehydes	4440-65-7	230.888	153.245	137696	233355	565670	0.663722	596.377	1010.69	2449.98	898.534	1522.76	3691.27	1.69471	4.1081	2.42407	0.827259	0.0495346	0.0495346	0.0495346	0.0495346	0.0495346	0.0495346	0.512691	0.0495346	0.0495346	0.000770708	6.43827e-05	6.43827e-05	6.43827e-05	6.43827e-05	6.43827e-05	6.43827e-05	0.000494949	6.43827e-05	6.43827e-05
Fatty aldehydes	66-25-1	39.1411	31.6198	21835.5	25398.2	45144.7	0.807841	557.865	648.889	1153.38	690.564	803.238	1427.74	1.16316	2.06749	1.77747	0.512691	0.0495346	0.0495346	0.0495346	0.0495346	0.0495346	0.0495346	0.827259	0.12663	0.0495346	0.000494949	6.43827e-05	6.43827e-05	6.43827e-05	6.43827e-05	6.43827e-05	6.43827e-05	0.000770708	0.000153019	6.43827e-05
Fatty aldehydes	6728-26-3	30.2492	17.5936	15365.1	27403.8	46943.3	0.581624	507.952	905.935	1551.89	873.335	1557.6	2668.2	1.7835	3.05519	1.71302	0.12663	0.0495346	0.0495346	0.0495346	0.0495346	0.0495346	0.0495346	0.512691	0.0495346	0.0495346	0.000153019	6.43827e-05	6.43827e-05	6.43827e-05	6.43827e-05	6.43827e-05	6.43827e-05	0.000494949	6.43827e-05	6.43827e-05
Fatty alcohols	111-27-3	36.1624	22.3892	25858.2	48904.1	33883.1	0.619129	715.057	1352.34	936.968	1154.94	2184.27	1513.37	1.89124	1.31034	0.692847	0.12663	0.0495346	0.0495346	0.0495346	0.0495346	0.0495346	0.0495346	0.512691	0.512691	0.827259	0.000153019	6.43827e-05	6.43827e-05	6.43827e-05	6.43827e-05	6.43827e-05	6.43827e-05	0.000494949	0.000494949	0.000770708
Fatty alcohols	3391-86-4	75.1494	154.616	33214	85956	375451	2.05745	441.973	1143.8	4996.05	214.816	555.932	2428.28	2.58795	11.304	4.36794	0.512691	0.0495346	0.0495346	0.0495346	0.0495346	0.0495346	0.0495346	0.0495346	0.0495346	0.0495346	0.000494949	6.43827e-05	6.43827e-05	6.43827e-05	6.43827e-05	6.43827e-05	6.43827e-05	6.43827e-05	6.43827e-05	6.43827e-05
Fatty alcohols	616-25-1	83.1628	199.616	14127.4	68991.1	107227	2.4003	169.876	829.59	1289.36	70.7728	345.619	537.165	4.8835	7.58999	1.55421	0.0495346	0.0495346	0.0495346	0.0495346	0.0495346	0.0495346	0.0495346	0.0495346	0.0495346	0.0495346	6.43827e-05	6.43827e-05	6.43827e-05	6.43827e-05	6.43827e-05	6.43827e-05	6.43827e-05	6.43827e-05	6.43827e-05	6.43827e-05
Fatty alcohols	928-95-0	16.5836	9.54737	0	10798.2	12035.6	0.57571	0	651.135	725.751	0	1131.01	1260.62	#DIV/0!	#DIV/0!	1.11459	0.275234	0.036904	0.0495346	0.0495346	0.036904	0.0495346	0.0495346	0.036904	0.036904	0.512691	0.000316785	6.43827e-05	6.43827e-05	6.43827e-05	6.43827e-05	6.43827e-05	6.43827e-05	6.43827e-05	6.43827e-05	0.000494949
Fatty alcohols	928-96-1	249.779	199.948	44935	462451	316705	0.800501	179.899	1851.44	1267.94	224.733	2312.86	1583.94	10.2916	7.04809	0.684841	0.275234	0.0495346	0.0495346	0.0495346	0.0495346	0.0495346	0.0495346	0.0495346	0.0495346	0.827259	0.000316785	6.43827e-05	6.43827e-05	6.43827e-05	6.43827e-05	6.43827e-05	6.43827e-05	6.43827e-05	6.43827e-05	0.000770708
Fatty acid esters	105-54-4	9.91054	9.30006	478297	3275.83	5428.92	0.938401	48261.5	330.54	547.792	51429.5	352.237	583.751	0.00684894	0.0113505	1.65727	0.512691	0.0495346	0.0495346	0.0495346	0.0495346	0.0495346	0.0495346	0.0495346	0.0495346	0.0495346	0.000494949	6.43827e-05	6.43827e-05	6.43827e-05	6.43827e-05	6.43827e-05	6.43827e-05	6.43827e-05	6.43827e-05	6.43827e-05
Fatty acid esters	105-66-8	0	0	71986.5	0	0	#DIV/0!	#DIV/0!	#DIV/0!	#DIV/0!	#DIV/0!	#DIV/0!	#DIV/0!	0	0	#DIV/0!	NA	0.036904	NA	NA	0.036904	NA	NA	0.036904	0.036904	NA	NA	6.43827e-05	NA	NA	6.43827e-05	NA	NA	6.43827e-05	6.43827e-05	NA
Fatty acid esters	106-70-7	0.622162	3.02432	521.542	0	0	4.86099	838.274	0	0	172.449	0	0	0	0	#DIV/0!	0.512691	0.375825	0.121335	0.121335	0.512691	0.036904	0.036904	0.121335	0.121335	NA	0.000494949	0.000419867	0.000150371	0.000150371	0.000494949	6.43827e-05	6.43827e-05	0.000150371	0.000150371	NA
Fatty acid esters	123-66-0	0	19.0654	76768.9	0	0	#DIV/0!	#DIV/0!	#DIV/0!	#DIV/0!	4026.61	0	0	0	0	#DIV/0!	0.036904	0.036904	0.317311	0.317311	0.0495346	0.506555	0.506555	0.0463016	0.0463016	0.796253	6.43827e-05	6.43827e-05	0.00035524	0.00035524	6.43827e-05	0.000494949	0.000494949	6.43827e-05	6.43827e-05	0.000765924
Fatty acid esters	137-32-6	12.1404	15.1382	29468.7	0	0	1.24693	2427.32	0	0	1946.64	0	0	0	0	#DIV/0!	0.12663	0.0495346	0.036904	0.506555	0.0495346	0.036904	0.506555	0.036904	0.0463016	0.317311	0.000153019	6.43827e-05	6.43827e-05	0.000494949	6.43827e-05	6.43827e-05	0.000494949	6.43827e-05	6.43827e-05	0.00035524
Fatty acid esters	37064-20-3	0	0	81938.5	0	0	#DIV/0!	#DIV/0!	#DIV/0!	#DIV/0!	#DIV/0!	#DIV/0!	#DIV/0!	0	0	#DIV/0!	NA	0.036904	NA	NA	0.036904	NA	NA	0.036904	0.036904	NA	NA	6.43827e-05	NA	NA	6.43827e-05	NA	NA	6.43827e-05	6.43827e-05	NA
Fatty acid esters	623-42-7	22.146	15.3127	5499.76	0	0	0.691444	248.342	0	0	359.164	0	0	0	0	#DIV/0!	0.512691	0.512691	0.036904	0.036904	0.512691	0.036904	0.036904	0.121335	0.121335	NA	0.000494949	0.000494949	6.43827e-05	6.43827e-05	0.000494949	6.43827e-05	6.43827e-05	0.000150371	0.000150371	NA
Fatty acid esters	626-77-7	9.59347	8.67125	4566.06	0	0	0.90387	475.954	0	0	526.574	0	0	0	0	#DIV/0!	0.275234	0.0495346	0.036904	0.036904	0.0495346	0.036904	0.036904	0.036904	0.036904	NA	0.000316785	6.43827e-05	6.43827e-05	6.43827e-05	6.43827e-05	6.43827e-05	6.43827e-05	6.43827e-05	6.43827e-05	NA
Fatty acid esters	626-82-4	0	0	503.242	0	0	#DIV/0!	#DIV/0!	#DIV/0!	#DIV/0!	#DIV/0!	#DIV/0!	#DIV/0!	0	0	#DIV/0!	NA	0.121335	NA	NA	0.121335	NA	NA	0.121335	0.121335	NA	NA	0.000150371	NA	NA	0.000150371	NA	NA	0.000150371	0.000150371	NA
Fatty acid esters	7452-79-1	0	0	327845	0	0	#DIV/0!	#DIV/0!	#DIV/0!	#DIV/0!	#DIV/0!	#DIV/0!	#DIV/0!	0	0	#DIV/0!	NA	0.036904	0.317311	0.317311	0.036904	0.317311	0.317311	0.0463016	0.0463016	0.796253	NA	6.43827e-05	0.00035524	0.00035524	6.43827e-05	0.00035524	0.00035524	6.43827e-05	6.43827e-05	0.000765924
Fatty acid esters	868-57-5	0.864419	0.825318	9381.22	0	0	0.954766	10852.6	0	0	11366.8	0	0	0	0	#DIV/0!	0.827259	0.0495346	0.121335	0.121335	0.0495346	0.036904	0.036904	0.036904	0.036904	NA	0.000770708	6.43827e-05	0.000150371	0.000150371	6.43827e-05	6.43827e-05	6.43827e-05	6.43827e-05	6.43827e-05	NA
Carboxylic acid esters	105-37-3	0	3.70781	52116.8	0	0	#DIV/0!	#DIV/0!	#DIV/0!	#DIV/0!	14055.9	0	0	0	0	#DIV/0!	0.0463016	0.0463016	0.317311	0.317311	0.0495346	0.036904	0.036904	0.036904	0.036904	NA	6.43827e-05	6.43827e-05	0.00035524	0.00035524	6.43827e-05	6.43827e-05	6.43827e-05	6.43827e-05	6.43827e-05	NA
Carboxylic acid esters	109-60-4	0	0	41777.7	0	0	#DIV/0!	#DIV/0!	#DIV/0!	#DIV/0!	#DIV/0!	#DIV/0!	#DIV/0!	0	0	#DIV/0!	NA	0.036904	NA	NA	0.036904	NA	NA	0.036904	0.036904	NA	NA	6.43827e-05	NA	NA	6.43827e-05	NA	NA	6.43827e-05	6.43827e-05	NA
Carboxylic acid esters	110-19-0	1.99088	2.86923	3461.55	0	0	1.44119	1738.7	0	0	1206.44	0	0	0	0	#DIV/0!	0.827259	0.512691	0.036904	0.036904	0.512691	0.036904	0.036904	0.121335	0.121335	NA	0.000770708	0.000494949	6.43827e-05	6.43827e-05	0.000494949	6.43827e-05	6.43827e-05	0.000150371	0.000150371	NA
Carboxylic acid esters	123-86-4	0	0	587848	0	0	#DIV/0!	#DIV/0!	#DIV/0!	#DIV/0!	#DIV/0!	#DIV/0!	#DIV/0!	0	0	#DIV/0!	NA	0.036904	NA	NA	0.036904	NA	NA	0.036904	0.036904	NA	NA	6.43827e-05	NA	NA	6.43827e-05	NA	NA	6.43827e-05	6.43827e-05	NA
Carboxylic acid esters	142-92-7	0	0	385359	3633.11	3889.53	#DIV/0!	#DIV/0!	#DIV/0!	#DIV/0!	#DIV/0!	#DIV/0!	#DIV/0!	0.00942785	0.0100933	1.07058	NA	0.036904	0.036904	0.036904	0.036904	0.036904	0.036904	0.0495346	0.0495346	0.512691	NA	6.43827e-05	6.43827e-05	6.43827e-05	6.43827e-05	6.43827e-05	6.43827e-05	6.43827e-05	6.43827e-05	0.000494949
Carboxylic acid esters	590-01-2	9.26085	14.1794	31996.5	0	0	1.53111	3455.03	0	0	2256.55	0	0	0	0	#DIV/0!	0.512691	0.512691	0.036904	0.036904	0.512691	0.036904	0.036904	0.121335	0.121335	NA	0.000494949	0.000494949	6.43827e-05	6.43827e-05	0.000494949	6.43827e-05	6.43827e-05	0.000150371	0.000150371	NA
Carboxylic acid esters	624-41-9	0	11.0615	337956	0	0	#DIV/0!	#DIV/0!	#DIV/0!	#DIV/0!	30552.6	0	0	0	0	#DIV/0!	0.036904	0.036904	NA	0.317311	0.0495346	0.036904	0.506555	0.036904	0.0463016	0.317311	6.43827e-05	6.43827e-05	NA	0.00035524	6.43827e-05	6.43827e-05	0.000494949	6.43827e-05	6.43827e-05	0.00035524
Carboxylic acid esters	628-63-7	0	0	18628.6	0	0	#DIV/0!	#DIV/0!	#DIV/0!	#DIV/0!	#DIV/0!	#DIV/0!	#DIV/0!	0	0	#DIV/0!	NA	0.121335	NA	NA	0.121335	NA	NA	0.121335	0.121335	NA	NA	0.000150371	NA	NA	0.000150371	NA	NA	0.000150371	0.000150371	NA
Carboxylic acid esters	97-62-1	5.29663	4.19306	0	0	0	0.791646	0	0	0	0	0	0	#DIV/0!	#DIV/0!	#DIV/0!	0.512691	0.506555	0.036904	0.036904	0.506555	0.036904	0.036904	0.317311	0.317311	NA	0.000494949	0.000494949	6.43827e-05	6.43827e-05	0.000494949	6.43827e-05	6.43827e-05	0.00035524	0.00035524	NA

## Sheet: Table S3 - Rep 1
Wilcoxon-Mann-Whitney test for volatile classes production across the light treatment (Experiment BIO1)
		Median							Fold Change																					p-value
Treatment		GH	R	B	BR	BRG	BRY	BRFr	R / GH	B / GH	BR / GH	BRG / GH	BRY / GH	BRFr / GH	B / R	BR / R	BRG / R	BRY / R	BRFr / R	BR / B	BRG / B	BRY / B	BRFr / B	BRG / BR	BRY / BR	BRFr / BR	BRY / BRG	BRFr / BRG	BRFr / BRY	GH vs R	GH vs B	GH vs BR	GH vs BRG	GH vs BRY	GH vs BRFr	R vs B	R vs BR	R vs BRG	R vs BRY	R vs BRFr	B vs BR	B vs BRG	B vs BRY	B vs BRFr	BR vs BRG	BR vs BRY	BR vs BRFr	BRG vs BRY	BRG vs BRFr
Class
Carboxylic acid esters		37.0166	93.457	88.0307	114.572	40.5345	24.9372	73.4378	2.52473	2.37814	3.09516	1.09503	0.673676	1.98391	0.941938	1.22594	0.433724	0.266831	0.785792	1.30151	0.460459	0.283279	0.834229	0.353789	0.217655	0.640972	0.61521	1.81173	2.94491	0.0495346	0.0495346	0.0495346	0.275234	0.275234	0.275234	0.275234	0.126631	0.0495346	0.0495346	0.0495346	0.0495346	0.0495346	0.0495346	0.0495346	0.0495346	0.0495346	0.0495346	0.0495346	0.512691
Fatty acyls		908.769	5272.39	2982.76	6516.56	15120.3	8601.51	3119.92	5.80169	3.28219	7.17076	16.6382	9.46501	3.43312	0.565731	1.23598	2.86783	1.63142	0.591746	2.18475	5.06924	2.88375	1.04598	2.32029	1.31995	0.478767	0.568871	0.206339	0.362717	0.0495346	0.0495346	0.0495346	0.0495346	0.0495346	0.0495346	0.275234	0.827259	0.275234	0.512691	0.512691	0.0495346	0.0495346	0.0495346	0.512691	0.0495346	0.275234	0.12663	0.0495346	0.0495346
Monoterpenoids		33268.9	45832	34275.6	46168.8	102757	105648	63175	1.37762	1.03026	1.38775	3.08867	3.17557	1.89892	0.747855	1.00735	2.24203	2.30511	1.3784	1.34699	2.99795	3.08229	1.84315	2.22568	2.28829	1.36835	1.02813	0.614801	0.597979	0.275234	0.827259	0.275234	0.0495346	0.0495346	0.0495346	0.275234	0.827259	0.0495346	0.0495346	0.12663	0.275234	0.0495346	0.0495346	0.0495346	0.12663	0.0495346	0.512691	0.827259	0.0495346
Phenylpropanoids		303244	367180	308789	483117	353220	338030	470715	1.21084	1.01829	1.59317	1.16481	1.11471	1.55227	0.840976	1.31575	0.961981	0.920612	1.28197	1.56455	1.14389	1.09469	1.52439	0.731127	0.699685	0.974328	0.956996	1.33264	1.39252	0.512691	0.827259	0.0495346	0.0495346	0.12663	0.0495346	0.512691	0.512691	0.827259	0.512691	0.512691	0.0495346	0.275234	0.827259	0.0495346	0.0495346	0.0495346	0.827259	0.275234	0.0495346
Sesquiterpenoids		104215	49670.1	44742.6	48230.2	157794	192464	137573	0.47661	0.429328	0.462793	1.51412	1.84679	1.32008	0.900795	0.97101	3.17684	3.87486	2.76973	1.07795	3.52671	4.3016	3.07476	3.27169	3.99054	2.85242	1.21972	0.871849	0.714795	0.275234	0.0495346	0.0495346	0.0495346	0.0495346	0.0495346	0.512691	0.512691	0.0495346	0.0495346	0.0495346	0.827259	0.0495346	0.0495346	0.0495346	0.0495346	0.0495346	0.0495346	0.512691	0.0495346
Wilcoxon-Mann-Whitney test for individual volatiles production across the light treatment (Experiment BIO1)
		Median							Fold Change																					p-value
Treatment		GH	R	B	BR	BRG	BRY	BRFr	R / GH	B / GH	BR / GH	BRG / GH	BRY / GH	BRFr / GH	B / R	BR / R	BRG / R	BRY / R	BRFr / R	BR / B	BRG / B	BRY / B	BRFr / B	BRG / BR	BRY / BR	BRFr / BR	BRY / BRG	BRFr / BRG	BRFr / BRY	GH vs R	GH vs B	GH vs BR	GH vs BRG	GH vs BRY	GH vs BRFr	R vs B	R vs BR	R vs BRG	R vs BRY	R vs BRFr	B vs BR	B vs BRG	B vs BRY	B vs BRFr	BR vs BRG	BR vs BRY	BR vs BRFr	BRG vs BRY	BRG vs BRFr
Class	CAS
Sesquiterpenoids	13744-15-5	6717.12	3219.17	2589.54	3006.65	13630.4	21028.5	10738.3	0.479249	0.385514	0.44761	2.0292	3.13059	1.59865	0.804413	0.933982	4.23412	6.53227	3.33573	1.16107	5.26362	8.12055	4.14679	4.53341	6.994	3.57151	1.54277	0.787821	0.510654	0.275234	0.0495346	0.0495346	0.0495346	0.0495346	0.0495346	0.275234	0.512691	0.0495346	0.0495346	0.0495346	0.827259	0.0495346	0.0495346	0.0495346	0.0495346	0.0495346	0.0495346	0.12663	0.0495346
Sesquiterpenoids	17334-55-3	840.577	404.052	344.721	301.546	1231.33	1606.22	850.149	0.480684	0.410101	0.358737	1.46486	1.91086	1.01139	0.85316	0.746305	3.04745	3.97529	2.10406	0.874754	3.57195	4.65949	2.46619	4.08338	5.32663	2.8193	1.30447	0.690433	0.529284	0.0495346	0.0495346	0.0495346	0.0495346	0.0495346	0.827259	0.512691	0.275234	0.0495346	0.0495346	0.12663	0.827259	0.0495346	0.0495346	0.0495346	0.0495346	0.0495346	0.0495346	0.275234	0.0495346
Sesquiterpenoids	17699-05-7	62073.8	29146.4	26217.5	28296.8	91536	100394	79672.2	0.469544	0.42236	0.455857	1.47463	1.61733	1.28351	0.899512	0.970851	3.14056	3.44447	2.73352	1.07931	3.49141	3.82927	3.03889	3.23485	3.54789	2.81559	1.09677	0.870393	0.793597	0.275234	0.0495346	0.0495346	0.0495346	0.0495346	0.0495346	0.512691	0.512691	0.0495346	0.0495346	0.0495346	0.827259	0.0495346	0.0495346	0.0495346	0.0495346	0.0495346	0.0495346	0.512691	0.0495346
Sesquiterpenoids	28973-97-9	11668.3	8841.48	7237.09	9516.15	24920.6	25017.4	23193.4	0.757735	0.620235	0.815556	2.13575	2.14405	1.98773	0.818538	1.07631	2.8186	2.82955	2.62325	1.31491	3.44345	3.45684	3.2048	2.61877	2.62895	2.43727	1.00389	0.930693	0.92709	0.512691	0.275234	0.512691	0.0495346	0.0495346	0.0495346	0.512691	0.827259	0.0495346	0.0495346	0.0495346	0.512691	0.0495346	0.0495346	0.0495346	0.0495346	0.0495346	0.0495346	0.827259	0.0495346
Sesquiterpenoids	30021-74-0	2556.59	640.69	808.225	787.726	3839.04	7365.92	4141.38	0.250604	0.316134	0.308116	1.50163	2.88115	1.61989	1.26149	1.2295	5.99204	11.4968	6.46393	0.974637	4.74997	9.1137	5.12404	4.87357	9.35086	5.25738	1.91869	1.07875	0.562235	0.0495346	0.0495346	0.0495346	0.0495346	0.0495346	0.0495346	0.827259	0.512691	0.0495346	0.0495346	0.0495346	0.827259	0.0495346	0.0495346	0.0495346	0.0495346	0.0495346	0.0495346	0.0495346	0.512691
Sesquiterpenoids	3242-4-4	514.622	104.875	66.4069	69.1516	429.914	1093.35	490.15	0.203789	0.12904	0.134373	0.835398	2.12456	0.952446	0.633203	0.659374	4.09932	10.4253	4.67368	1.04133	6.47394	16.4644	7.38101	6.21698	15.8109	7.08805	2.54318	1.14011	0.448302	0.0495346	0.0495346	0.0495346	0.827259	0.0495346	0.827259	0.12663	0.275234	0.0495346	0.0495346	0.0495346	0.512691	0.0495346	0.0495346	0.0495346	0.0495346	0.0495346	0.0495346	0.0495346	0.512691
Sesquiterpenoids	3691-11-0	617.1	137.404	94.4564	135.945	666.303	994.716	508.259	0.222661	0.153065	0.220297	1.07973	1.61192	0.823625	0.687434	0.989381	4.84922	7.23934	3.699	1.43924	7.05408	10.531	5.38088	4.90127	7.31704	3.7387	1.49289	0.762804	0.510959	0.0495346	0.0495346	0.0495346	0.275234	0.0495346	0.512691	0.275234	0.827259	0.0495346	0.0495346	0.0495346	0.275234	0.0495346	0.0495346	0.0495346	0.0495346	0.0495346	0.0495346	0.275234	0.0495346
Sesquiterpenoids	3853-83-6	484.844	292.89	234.576	280.279	1146.6	1526.69	853.379	0.60409	0.483818	0.578081	2.36489	3.14883	1.76011	0.800904	0.956945	3.9148	5.21252	2.91365	1.19483	4.88797	6.5083	3.63796	4.09093	5.44704	3.04474	1.33149	0.744267	0.558972	0.512691	0.0495346	0.275234	0.0495346	0.0495346	0.0495346	0.275234	0.512691	0.0495346	0.0495346	0.0495346	0.512691	0.0495346	0.0495346	0.0495346	0.0495346	0.0495346	0.0495346	0.512691	0.0495346
Sesquiterpenoids	39029-41-9	2558.57	647.462	816.706	760.289	3840.19	7374.95	4149.11	0.253056	0.319204	0.297154	1.50091	2.88245	1.62165	1.2614	1.17426	5.93114	11.3906	6.40827	0.930922	4.70204	9.03012	5.0803	5.05095	9.70019	5.45728	1.92047	1.08044	0.562595	0.0495346	0.0495346	0.0495346	0.12663	0.0495346	0.0495346	0.827259	0.512691	0.0495346	0.0495346	0.0495346	0.827259	0.0495346	0.0495346	0.0495346	0.0495346	0.0495346	0.0495346	0.0495346	0.512691
Sesquiterpenoids	483-76-1	125.542	130.543	135.235	120.815	150.861	180.923	175.711	1.03983	1.07721	0.962344	1.20167	1.44113	1.39961	1.03594	0.92548	1.15564	1.38592	1.346	0.89337	1.11555	1.33784	1.2993	1.2487	1.49752	1.45438	1.19927	1.16472	0.971192	0.827259	0.512691	0.827259	0.12663	0.0495346	0.0495346	0.827259	0.827259	0.512691	0.0495346	0.0495346	0.827259	0.275234	0.0495346	0.0495346	0.512691	0.0495346	0.12663	0.0495346	0.12663
Sesquiterpenoids	483-77-2	213.17	142.411	207.589	226.993	213.297	353.047	284.978	0.668061	0.973818	1.06484	1.0006	1.65618	1.33686	1.45768	1.59393	1.49776	2.47908	2.0011	1.09347	1.0275	1.7007	1.3728	0.939666	1.55532	1.25545	1.65519	1.33606	0.807196	0.12663	0.512691	0.275234	0.512691	0.0495346	0.0495346	0.512691	0.12663	0.0495346	0.0495346	0.0495346	0.0495346	0.0495346	0.0495346	0.0495346	0.827259	0.0495346	0.0495346	0.0495346	0.512691
Sesquiterpenoids	54274-73-6	668.665	149.888	165.451	176.057	630.781	1366.23	727.424	0.22416	0.247435	0.263297	0.943343	2.04322	1.08787	1.10383	1.17459	4.20835	9.11502	4.85312	1.06411	3.81249	8.25763	4.39661	3.58281	7.76015	4.13174	2.16594	1.15321	0.532431	0.0495346	0.0495346	0.0495346	0.827259	0.0495346	0.512691	0.827259	0.827259	0.0495346	0.0495346	0.0495346	0.512691	0.0495346	0.0495346	0.0495346	0.0495346	0.0495346	0.0495346	0.0495346	0.512691
Sesquiterpenoids	6753-98-6	14168.9	9741.7	5285.86	4128.37	13665.2	18049.7	10188.7	0.68754	0.37306	0.291368	0.964448	1.27389	0.719088	0.542602	0.423783	1.40275	1.85283	1.04589	0.781021	2.58524	3.41472	1.92754	3.31007	4.37212	2.46797	1.32085	0.745595	0.56448	0.0495346	0.0495346	0.0495346	0.827259	0.0495346	0.0495346	0.12663	0.12663	0.0495346	0.0495346	0.827259	0.512691	0.0495346	0.0495346	0.0495346	0.0495346	0.0495346	0.0495346	0.512691	0.0495346
Sesquiterpenoids	87-44-5	1377.01	587.818	539.185	496.531	2759.25	3952.17	2040.23	0.42688	0.391562	0.360587	2.0038	2.87011	1.48164	0.917265	0.844703	4.69406	6.72346	3.47086	0.920893	5.11745	7.3299	3.78392	5.55706	7.95956	4.10897	1.43233	0.739415	0.516231	0.275234	0.0495346	0.0495346	0.0495346	0.0495346	0.0495346	0.827259	0.512691	0.0495346	0.0495346	0.0495346	0.827259	0.0495346	0.0495346	0.0495346	0.0495346	0.0495346	0.0495346	0.12663	0.0495346
Phenylpropanoids	140-67-0	2156.82	739.134	1106.67	1038.62	4552.48	7826.93	3406.17	0.342696	0.513104	0.48155	2.11073	3.62891	1.57925	1.49726	1.40518	6.15921	10.5893	4.60833	0.938505	4.11366	7.07248	3.07785	4.38321	7.5359	3.27952	1.71927	0.748201	0.435186	0.512691	0.0495346	0.275234	0.0495346	0.0495346	0.275234	0.827259	0.512691	0.275234	0.0495346	0.512691	0.827259	0.0495346	0.0495346	0.0495346	0.0495346	0.0495346	0.0495346	0.12663	0.0495346
Phenylpropanoids	1754-62-7	348.924	1713.92	719.545	1239.32	1568.83	989.414	1361.77	4.91203	2.06218	3.55185	4.4962	2.83562	3.90277	0.419823	0.723092	0.915344	0.57728	0.794534	1.72237	2.18031	1.37505	1.89254	1.26587	0.798349	1.0988	0.63067	0.868016	1.37634	0.0495346	0.0495346	0.0495346	0.0495346	0.0495346	0.0495346	0.12663	0.827259	0.827259	0.512691	0.512691	0.12663	0.0495346	0.512691	0.0495346	0.275234	0.12663	0.512691	0.0495346	0.512691
Phenylpropanoids	93-15-2	298905	361674	306326	479275	339944	325734	464053	1.21	1.02483	1.60344	1.1373	1.08976	1.55251	0.846968	1.32516	0.939918	0.900629	1.28307	1.56459	1.10974	1.06336	1.5149	0.709287	0.679639	0.968239	0.9582	1.36509	1.42464	0.512691	0.827259	0.0495346	0.0495346	0.512691	0.0495346	0.512691	0.512691	0.827259	0.512691	0.512691	0.0495346	0.275234	0.827259	0.0495346	0.0495346	0.0495346	0.827259	0.275234	0.0495346
Phenylpropanoids	97-53-0	832.973	2343.91	636.699	2342.29	7492.78	2563.38	2115.15	2.81391	0.764369	2.81197	8.99522	3.07738	2.53928	0.27164	0.99931	3.1967	1.09363	0.902403	3.67881	11.7682	4.02604	3.32206	3.19891	1.09439	0.903026	0.342113	0.282292	0.825142	0.12663	0.827259	0.0495346	0.0495346	0.0495346	0.0495346	0.12663	0.827259	0.0495346	0.275234	0.512691	0.0495346	0.0495346	0.0495346	0.0495346	0.0495346	0.275234	0.512691	0.0495346	0.0495346
NA	272-16-2	6133.99	7924.32	11799.3	14629.4	5305.23	3583.72	9162.5	1.29187	1.92359	2.38497	0.86489	0.584239	1.49373	1.489	1.84614	0.669487	0.452243	1.15625	1.23985	0.449622	0.303722	0.776528	0.362642	0.244967	0.626308	0.675506	1.72707	2.55671	0.0495346	0.0495346	0.0495346	0.275234	0.0495346	0.12663	0.275234	0.0495346	0.0495346	0.0495346	0.827259	0.0495346	0.0495346	0.0495346	0.12663	0.0495346	0.0495346	0.0495346	0.0495346	0.0495346
Monoterpenoids	10032-15-2	0	0	0	0	2.54333	1.43678	0	#DIV/0!	#DIV/0!	#DIV/0!	#DIV/0!	#DIV/0!	#DIV/0!	#DIV/0!	#DIV/0!	#DIV/0!	#DIV/0!	#DIV/0!	#DIV/0!	#DIV/0!	#DIV/0!	#DIV/0!	#DIV/0!	#DIV/0!	#DIV/0!	0.564921	0	0	NA	NA	0.317311	0.036904	0.121335	NA	NA	0.317311	0.036904	0.121335	NA	0.317311	0.036904	0.121335	NA	0.0463016	0.246315	0.317311	0.0495346	0.036904
Monoterpenoids	13466-78-9	393.841	1436.47	1097.54	1077.36	2237.62	1958.14	1073.04	3.64733	2.78677	2.73552	5.68153	4.97191	2.72457	0.764058	0.750007	1.55772	1.36317	0.747003	0.981609	2.03875	1.78411	0.977678	2.07695	1.81754	0.995995	0.875102	0.479548	0.547991	0.0495346	0.0495346	0.0495346	0.0495346	0.0495346	0.0495346	0.275234	0.512691	0.12663	0.0495346	0.12663	0.827259	0.12663	0.0495346	0.827259	0.12663	0.0495346	0.827259	0.827259	0.0495346
Monoterpenoids	13877-91-3	7832.72	10766.8	7995.65	12390.9	21633.1	23211.5	12883.6	1.37459	1.0208	1.58195	2.76189	2.96341	1.64484	0.742621	1.15085	2.00924	2.15585	1.1966	1.54971	2.70561	2.90302	1.61133	1.74588	1.87327	1.03976	1.07297	0.595551	0.555051	0.275234	0.827259	0.275234	0.0495346	0.0495346	0.275234	0.275234	0.827259	0.12663	0.0495346	0.512691	0.275234	0.0495346	0.0495346	0.275234	0.12663	0.0495346	0.827259	0.275234	0.12663
Monoterpenoids	18172-67-3	3339.97	4987.43	3855.71	4968.41	11378.2	10956.1	5311.27	1.49326	1.15442	1.48756	3.40667	3.28032	1.59022	0.773084	0.996185	2.28136	2.19675	1.06493	1.28859	2.95099	2.84154	1.37751	2.2901	2.20516	1.06901	0.96291	0.466796	0.484776	0.12663	0.512691	0.275234	0.0495346	0.0495346	0.12663	0.512691	0.827259	0.12663	0.0495346	0.827259	0.827259	0.12663	0.0495346	0.512691	0.12663	0.0495346	0.827259	0.827259	0.12663
Monoterpenoids	470-82-6	15232.8	15971.7	13211	17106.3	41357	38663.6	27819.9	1.04851	0.867275	1.12299	2.715	2.53818	1.82632	0.827151	1.07104	2.58939	2.42076	1.74182	1.29485	3.13049	2.92662	2.10581	2.41764	2.26019	1.62629	0.934875	0.672677	0.719537	0.827259	0.512691	0.827259	0.0495346	0.0495346	0.0495346	0.512691	0.512691	0.0495346	0.0495346	0.12663	0.512691	0.0495346	0.0495346	0.0495346	0.0495346	0.12663	0.512691	0.512691	0.0495346
Monoterpenoids	4821-4-9	269.738	617.599	563.071	769.51	1975.99	1461.9	766.751	2.28963	2.08748	2.85281	7.3256	5.4197	2.84258	0.911709	1.24597	3.19947	2.36707	1.2415	1.36663	3.50931	2.5963	1.36173	2.56786	1.89978	0.996416	0.739831	0.388034	0.52449	0.12663	0.12663	0.0495346	0.0495346	0.0495346	0.0495346	0.827259	0.512691	0.0495346	0.0495346	0.827259	0.275234	0.0495346	0.0495346	0.12663	0.12663	0.275234	0.827259	0.275234	0.0495346
Monoterpenoids	3387-41-5	1931.73	2728.82	2073.58	2607.75	6514	6711.37	2862.16	1.41263	1.07343	1.34995	3.37211	3.47427	1.48166	0.759882	0.955632	2.38711	2.45944	1.04887	1.25761	3.14143	3.23661	1.3803	2.49794	2.57363	1.09756	1.0303	0.439386	0.426465	0.12663	0.512691	0.827259	0.0495346	0.0495346	0.12663	0.512691	0.827259	0.0495346	0.0495346	0.827259	0.827259	0.0495346	0.0495346	0.827259	0.12663	0.0495346	0.827259	0.275234	0.0495346
Monoterpenoids	5986-38-9	238.762	197.889	163.355	290.089	865.583	1136.28	371.886	0.828813	0.684176	1.21497	3.62529	4.75904	1.55756	0.825488	1.46592	4.37408	5.742	1.87926	1.77582	5.29878	6.95588	2.27655	2.98386	3.91701	1.28197	1.31273	0.429636	0.327284	0.827259	0.12663	0.275234	0.0495346	0.0495346	0.0495346	0.512691	0.512691	0.0495346	0.0495346	0.512691	0.12663	0.0495346	0.0495346	0.0495346	0.0495346	0.0495346	0.512691	0.512691	0.0495346
Monoterpenoids	5989-27-5	480.577	737.84	611.283	890.325	1527.86	1656.4	806.461	1.53532	1.27198	1.85261	3.17921	3.4467	1.67811	0.828478	1.20666	2.07072	2.24494	1.093	1.45648	2.49942	2.70971	1.31929	1.71607	1.86045	0.905806	1.08414	0.527839	0.486875	0.275234	0.275234	0.12663	0.0495346	0.0495346	0.12663	0.275234	0.827259	0.275234	0.12663	0.827259	0.275234	0.12663	0.0495346	0.275234	0.12663	0.0495346	0.512691	0.275234	0.12663
Monoterpenoids	673-84-7	813.879	2456.83	1473.99	1486.83	5193.21	5058.17	2920.4	3.01867	1.81107	1.82684	6.38082	6.21489	3.58825	0.599957	0.605181	2.11379	2.05882	1.18869	1.00871	3.52323	3.43161	1.98129	3.49282	3.40199	1.96418	0.973996	0.56235	0.577364	0.0495346	0.0495346	0.12663	0.0495346	0.0495346	0.0495346	0.512691	0.512691	0.0495346	0.0495346	0.0495346	0.827259	0.0495346	0.0495346	0.0495346	0.0495346	0.0495346	0.275234	0.827259	0.0495346
Monoterpenoids	78-70-6	643.061	344.469	796.317	789.294	1770.04	2209.61	1767.13	0.535671	1.23832	1.2274	2.75253	3.43609	2.748	2.31172	2.29134	5.13847	6.41455	5.13002	0.991181	2.22279	2.77479	2.21913	2.24257	2.79948	2.23888	1.24834	0.998355	0.799748	0.512691	0.275234	0.0495346	0.0495346	0.0495346	0.12663	0.12663	0.0495346	0.0495346	0.0495346	0.12663	0.827259	0.0495346	0.0495346	0.275234	0.512691	0.512691	0.827259	0.827259	0.512691
Monoterpenoids	80-56-8	1243.08	2470.31	1679.81	2272.24	4381.42	3974.64	2015.47	1.98726	1.35134	1.82792	3.52466	3.19743	1.62136	0.68	0.919819	1.77363	1.60896	0.815877	1.35267	2.60828	2.36612	1.19982	1.92824	1.74922	0.886997	0.907158	0.460004	0.507082	0.0495346	0.275234	0.12663	0.0495346	0.0495346	0.12663	0.275234	0.827259	0.275234	0.0495346	0.275234	0.827259	0.12663	0.0495346	0.827259	0.275234	0.0495346	0.827259	0.827259	0.12663
Monoterpenoids	98-55-5	1466.42	919.587	676.982	1343.45	4562.19	6241.17	2290.95	0.627095	0.461655	0.916137	3.1111	4.25604	1.56227	0.736181	1.46092	4.96113	6.78692	2.49129	1.98446	6.73901	9.21909	3.38407	3.39589	4.64564	1.70528	1.36802	0.502161	0.367072	0.512691	0.0495346	0.827259	0.0495346	0.0495346	0.0495346	0.512691	0.512691	0.0495346	0.0495346	0.512691	0.12663	0.0495346	0.0495346	0.0495346	0.0495346	0.0495346	0.512691	0.512691	0.0495346
Monoterpenoids	99-83-2	78.4545	238.468	175.334	183.467	448.882	410.683	208.405	3.03957	2.23485	2.33852	5.72155	5.23466	2.65638	0.735253	0.769358	1.88236	1.72217	0.873933	1.04639	2.56015	2.34229	1.18862	2.44666	2.23845	1.13592	0.914902	0.464276	0.50746	0.0495346	0.0495346	0.0495346	0.0495346	0.0495346	0.0495346	0.512691	0.512691	0.0495346	0.0495346	0.827259	0.827259	0.12663	0.0495346	0.512691	0.12663	0.0495346	0.512691	0.827259	0.0495346
Fatty aldehydes	124-13-0	45.7404	56.2354	107.844	88.514	73.8681	107.152	76.8472	1.22945	2.35774	1.93514	1.61494	2.34262	1.68007	1.91772	1.57399	1.31355	1.90542	1.36653	0.82076	0.684954	0.993586	0.712578	0.834536	1.21057	0.868193	1.45059	1.04033	0.717178	0.827259	0.0495346	0.0495346	0.12663	0.0495346	0.12663	0.0495346	0.0495346	0.512691	0.0495346	0.275234	0.512691	0.12663	0.275234	0.0495346	0.275234	0.827259	0.275234	0.12663	0.827259
Fatty aldehydes	4440-65-7	153.245	1089.99	780.897	1859.3	3955.49	2349.43	1011.95	7.11268	5.09573	12.1328	25.8115	15.3312	6.60347	0.716428	1.7058	3.62894	2.15547	0.928407	2.38098	5.06532	3.00863	1.29588	2.12741	1.26361	0.544265	0.593967	0.255835	0.430722	0.12663	0.12663	0.0495346	0.0495346	0.0495346	0.0495346	0.512691	0.827259	0.0495346	0.512691	0.827259	0.275234	0.0495346	0.0495346	0.512691	0.0495346	0.512691	0.275234	0.0495346	0.0495346
Fatty aldehydes	66-25-1	31.6198	72.2896	96.7106	184.57	250.351	246.197	88.9671	2.28621	3.05855	5.83718	7.91755	7.78616	2.81365	1.33782	2.55321	3.46317	3.4057	1.2307	1.90848	2.58866	2.54571	0.919931	1.3564	1.33389	0.482022	0.983405	0.355369	0.361366	0.0495346	0.0495346	0.0495346	0.0495346	0.0495346	0.0495346	0.512691	0.12663	0.0495346	0.12663	0.827259	0.0495346	0.0495346	0.12663	0.275234	0.275234	0.827259	0.0495346	0.512691	0.0495346
Fatty aldehydes	6728-26-3	17.5936	54.9917	55.9377	143.276	363.484	276.357	92.8377	3.12566	3.17943	8.14363	20.66	15.7078	5.27678	1.0172	2.60541	6.6098	5.02543	1.68821	2.56135	6.49801	4.94044	1.65966	2.53695	1.92884	0.647964	0.760301	0.255411	0.335934	0.0495346	0.0495346	0.0495346	0.0495346	0.0495346	0.12663	0.827259	0.275234	0.0495346	0.12663	0.827259	0.0495346	0.0495346	0.12663	0.512691	0.0495346	0.512691	0.275234	0.512691	0.0495346
Fatty alcohols	111-27-3	22.3892	87.9751	96.2105	245.471	388.835	219.212	107.944	3.92935	4.29718	10.9638	17.3671	9.79096	4.82126	1.09361	2.79023	4.41983	2.49175	1.22699	2.55139	4.0415	2.27846	1.12196	1.58404	0.893027	0.439744	0.563766	0.277609	0.492419	0.0495346	0.0495346	0.0495346	0.0495346	0.0495346	0.0495346	0.827259	0.512691	0.275234	0.512691	0.827259	0.0495346	0.0495346	0.12663	0.827259	0.0495346	0.827259	0.12663	0.0495346	0.0495346
Fatty alcohols	3391-86-4	154.616	178.611	121.26	365.559	1144.24	1602.55	328.135	1.15519	0.784265	2.3643	7.4005	10.3647	2.12226	0.678906	2.04668	6.40632	8.97234	1.83716	3.01467	9.43623	13.2159	2.70605	3.1301	4.38385	0.897627	1.40055	0.286772	0.204758	0.827259	0.275234	0.512691	0.0495346	0.0495346	0.0495346	0.275234	0.827259	0.0495346	0.0495346	0.512691	0.12663	0.0495346	0.0495346	0.0495346	0.0495346	0.0495346	0.827259	0.827259	0.0495346
Fatty alcohols	616-25-1	199.616	128.352	182.017	320.595	634.304	718.604	216.349	0.642995	0.911837	1.60606	3.17762	3.59993	1.08382	1.41811	2.49778	4.9419	5.59869	1.68559	1.76135	3.48486	3.948	1.18862	1.97852	2.24147	0.674835	1.1329	0.341081	0.301068	0.512691	0.512691	0.512691	0.0495346	0.0495346	0.827259	0.512691	0.512691	0.275234	0.275234	0.512691	0.275234	0.0495346	0.0495346	0.12663	0.12663	0.0495346	0.512691	0.827259	0.0495346
Fatty alcohols	928-95-0	9.54737	31.1639	24.0526	86.8211	125.534	68.258	39.542	3.26413	2.51929	9.09372	13.1486	7.1494	4.14166	0.771811	2.78596	4.0282	2.19029	1.26884	3.60963	5.21915	2.83786	1.64398	1.44589	0.786191	0.455442	0.543741	0.31499	0.579302	0.0495346	0.0495346	0.0495346	0.0495346	0.0495346	0.12663	0.512691	0.512691	0.275234	0.512691	0.827259	0.0495346	0.0495346	0.0495346	0.512691	0.0495346	0.827259	0.275234	0.12663	0.0495346
Fatty alcohols	928-96-1	199.948	3403.36	991.699	2561.14	9347.44	3400.17	1024.11	17.0212	4.95979	12.8091	46.7494	17.0053	5.12187	0.291389	0.752535	2.74654	0.999065	0.300911	2.58258	9.42568	3.42863	1.03268	3.64971	1.3276	0.399863	0.363755	0.10956	0.301193	0.0495346	0.0495346	0.0495346	0.0495346	0.0495346	0.0495346	0.12663	0.827259	0.275234	0.827259	0.12663	0.0495346	0.0495346	0.0495346	0.512691	0.12663	0.512691	0.275234	0.0495346	0.0495346
Fatty acid esters	105-54-4	9.30006	18.8321	20.2712	32.2556	38.4891	38.3141	20.33	2.02495	2.17968	3.46833	4.13859	4.11977	2.186	1.07641	1.7128	2.0438	2.03451	1.07954	1.59121	1.89871	1.89008	1.0029	1.19325	1.18783	0.630277	0.995452	0.5282	0.530613	0.0495346	0.0495346	0.0495346	0.0495346	0.0495346	0.0495346	0.275234	0.0495346	0.0495346	0.512691	0.827259	0.275234	0.12663	0.512691	0.827259	0.275234	0.827259	0.0495346	0.512691	0.0495346
Fatty acid esters	106-70-7	3.02432	7.11724	5.56459	8.67607	4.91528	2.8142	5.15765	2.35334	1.83995	2.86876	1.62525	0.930521	1.70539	0.781846	1.21902	0.690615	0.395405	0.724669	1.55916	0.883314	0.505733	0.92687	0.566533	0.324363	0.594469	0.572541	1.04931	1.83273	0.512691	0.0495346	0.0495346	0.0495346	0.827259	0.512691	0.827259	0.0495346	0.512691	0.512691	0.827259	0.275234	0.275234	0.0495346	0.827259	0.0495346	0.0495346	0.275234	0.0495346	0.827259
Fatty acid esters	123-66-0	19.0654	27.7422	25.985	30.9255	7.00594	4.25158	14.8634	1.45511	1.36294	1.62207	0.367469	0.223	0.779599	0.936661	1.11474	0.252537	0.153253	0.535767	1.19013	0.269614	0.163616	0.571997	0.226542	0.137478	0.480618	0.606854	2.12154	3.49596	0.275234	0.12663	0.0495346	0.0495346	0.0495346	0.827259	0.827259	0.275234	0.0495346	0.0495346	0.275234	0.827259	0.0495346	0.0495346	0.12663	0.0495346	0.0495346	0.0495346	0.275234	0.275234
Fatty acid esters	137-32-6	15.1382	31.1804	32.3825	51.3676	81.1203	36.4658	20.5403	2.05971	2.13913	3.39324	5.35864	2.40886	1.35685	1.03855	1.64743	2.60165	1.16951	0.658756	1.58628	2.50506	1.1261	0.634301	1.57921	0.7099	0.399868	0.449528	0.253208	0.563274	0.0495346	0.0495346	0.0495346	0.0495346	0.512691	0.0495346	0.827259	0.275234	0.12663	0.827259	0.0495346	0.12663	0.12663	0.827259	0.275234	0.827259	0.275234	0.0495346	0.0495346	0.0495346
Fatty acid esters	623-42-7	15.3127	26.7069	25.0582	31.8173	15.9431	13.1461	26.5912	1.74411	1.63643	2.07784	1.04117	0.858512	1.73655	0.938264	1.19135	0.596964	0.492237	0.995667	1.26974	0.636242	0.524625	1.06118	0.501082	0.413176	0.835748	0.824567	1.66789	2.02274	0.0495346	0.0495346	0.0495346	0.275234	0.12663	0.0495346	0.512691	0.512691	0.275234	0.0495346	0.512691	0.0495346	0.512691	0.0495346	0.827259	0.512691	0.0495346	0.512691	0.0495346	0.512691
Fatty acid esters	626-77-7	8.67125	21.5475	16.2973	18.4102	5.69832	4.15979	12.0799	2.48494	1.87946	2.12313	0.65715	0.479722	1.3931	0.756343	0.8544	0.264454	0.193052	0.560618	1.12965	0.349648	0.255244	0.741222	0.30952	0.22595	0.656154	0.730003	2.11991	2.90398	0.0495346	0.0495346	0.0495346	0.0495346	0.0495346	0.12663	0.512691	0.512691	0.0495346	0.0495346	0.275234	0.0495346	0.0495346	0.0495346	0.0495346	0.0495346	0.0495346	0.0495346	0.512691	0.0495346
Fatty acid esters	868-57-5	0.825318	5.00971	2.62795	4.64154	2.14125	1.44539	1.49375	6.07004	3.18416	5.62395	2.59445	1.75131	1.8099	0.52457	0.926509	0.427419	0.288517	0.29817	1.76622	0.814798	0.550006	0.568408	0.461322	0.311402	0.321821	0.675021	0.697606	1.03346	0.12663	0.0495346	0.0495346	0.0495346	0.512691	0.12663	0.512691	0.827259	0.512691	0.275234	0.512691	0.275234	0.827259	0.275234	0.827259	0.512691	0.12663	0.512691	0.275234	0.512691
Carboxylic acid esters	105-37-3	3.70781	7.03663	5.34503	0	0	2.24008	0.573757	1.89779	1.44156	0	0	0.604152	0.154743	0.7596	0	0	0.318346	0.0815387	0	0	0.419096	0.107344	#DIV/0!	#DIV/0!	#DIV/0!	#DIV/0!	#DIV/0!	0.256133	0.0495346	0.275234	0.036904	0.0463016	0.0495346	0.512691	0.275234	0.036904	0.0463016	0.0495346	0.512691	0.036904	0.0463016	0.0495346	0.512691	0.317311	0.121335	0.121335	0.816639	0.486674
Carboxylic acid esters	110-19-0	2.86923	9.74302	3.82944	10.1932	6.39923	2.83023	3.72967	3.3957	1.33466	3.5526	2.2303	0.986409	1.29989	0.393045	1.0462	0.656801	0.290488	0.382804	2.6618	1.67106	0.739071	0.973944	0.627794	0.277659	0.365898	0.442277	0.582831	1.3178	0.0495346	0.275234	0.0495346	0.0495346	0.827259	0.12663	0.275234	0.275234	0.512691	0.12663	0.275234	0.0495346	0.0495346	0.827259	0.827259	0.0495346	0.0495346	0.0495346	0.12663	0.0495346
Carboxylic acid esters	590-01-2	14.1794	43.9238	48.8572	69.212	16.4808	14.4692	40.613	3.09772	3.44565	4.88117	1.16231	1.02044	2.86422	1.11232	1.57573	0.375213	0.329415	0.924622	1.41662	0.337326	0.296152	0.831258	0.238121	0.209056	0.58679	0.877941	2.46426	2.80686	0.0495346	0.0495346	0.0495346	0.275234	0.827259	0.12663	0.827259	0.12663	0.0495346	0.0495346	0.512691	0.0495346	0.0495346	0.0495346	0.512691	0.0495346	0.0495346	0.12663	0.275234	0.512691
Carboxylic acid esters	624-41-9	11.0615	25.1752	23.0937	27.7816	11.9416	3.24583	7.65722	2.27594	2.08776	2.51156	1.07956	0.293436	0.692242	0.91732	1.10353	0.474338	0.128929	0.304157	1.20299	0.517091	0.14055	0.331571	0.429838	0.116834	0.275622	0.27181	0.641224	2.35909	0.0495346	0.0495346	0.0495346	0.827259	0.0495346	0.827259	0.512691	0.827259	0.0495346	0.0495346	0.0495346	0.512691	0.0495346	0.0495346	0.0495346	0.0495346	0.0495346	0.0495346	0.0495346	0.827259
Carboxylic acid esters	97-62-1	4.19306	7.03935	5.50795	12.6411	5.14325	3.47025	4.83823	1.67881	1.31359	3.01477	1.22661	0.827619	1.15387	0.782452	1.79578	0.730642	0.492979	0.687312	2.29506	0.933786	0.630044	0.878409	0.406867	0.274522	0.382738	0.67472	0.940696	1.3942	0.275234	0.275234	0.0495346	0.12663	0.275234	0.275234	0.827259	0.12663	0.512691	0.275234	0.275234	0.0495346	0.512691	0.0495346	0.512691	0.0495346	0.0495346	0.0495346	0.0495346	0.827259
[truncated: 22 more columns]

## Sheet: Table S3 - Rep 2
		Median							Fold Change																					p-value
Treatment		GH	R	B	BR	BRG	BRY	BRFr	R / GH	B / GH	BR / GH	BRG / GH	BRY / GH	BRFr / GH	B / R	BR / R	BRG / R	BRY / R	BRFr / R	BR / B	BRG / B	BRY / B	BRFr / B	BRG / BR	BRY / BR	BRFr / BR	BRY / BRG	BRFr / BRG	BRFr / BRY	GH vs R	GH vs B	GH vs BR	GH vs BRG	GH vs BRY	GH vs BRFr	R vs B	R vs BR	R vs BRG	R vs BRY	R vs BRFr	B vs BR	B vs BRG	B vs BRY	B vs BRFr	BR vs BRG	BR vs BRY	BR vs BRFr	BRG vs BRY	BRG vs BRFr
Class	CAS
Fatty alcohols	616-25-1	4617.04	9132.55	2026.75	2699.2	20892.5	3267.39	5477.91	1.97801	0.438972	0.584618	4.52509	0.707682	1.18645	0.221926	0.295559	2.2877	0.357774	0.599822	1.33179	10.3084	1.61213	2.7028	7.74024	1.2105	2.02945	0.156391	0.262195	1.67654	0.275234	0.512691	0.275234	0.0495346	0.512691	0.275234	0.512691	0.275234	0.275234	0.275234	0.512691	0.827259	0.12663	0.512691	0.512691	0.0495346	0.512691	0.12663	0.0495346	0.0495346
Fatty aldehydes	4440-65-7	30193	438.229	8136.91	5021.57	124548	22026.2	36832.4	0.0145143	0.269497	0.166316	4.12506	0.729512	1.2199	18.5677	11.4588	284.208	50.2618	84.0484	0.617135	15.3065	2.70694	4.52658	24.8026	4.38631	7.33483	0.176849	0.295729	1.67221	0.0495346	0.12663	0.12663	0.0495346	0.512691	0.512691	0.275234	0.275234	0.0495346	0.0495346	0.0495346	0.275234	0.0495346	0.12663	0.0495346	0.0495346	0.12663	0.0495346	0.0495346	0.0495346
Fatty aldehydes	66-25-1	4418.66	0	2512.87	2874.48	12869	2401.27	4163.1	0	0.568695	0.650531	2.91243	0.543437	0.942162	#DIV/0!	#DIV/0!	#DIV/0!	#DIV/0!	#DIV/0!	1.1439	5.12125	0.955587	1.65671	4.477	0.835375	1.4483	0.186593	0.323497	1.73371	0.0463016	0.827259	0.827259	0.0495346	0.275234	0.827259	0.121183	0.0463016	0.0463016	0.121183	0.0463016	0.512691	0.12663	0.512691	0.827259	0.0495346	0.275234	0.827259	0.0495346	0.0495346
Fatty acid esters	105-54-4	0	0	0	0	1356.22	0	0	#DIV/0!	#DIV/0!	#DIV/0!	#DIV/0!	#DIV/0!	#DIV/0!	#DIV/0!	#DIV/0!	#DIV/0!	#DIV/0!	#DIV/0!	#DIV/0!	#DIV/0!	#DIV/0!	#DIV/0!	#DIV/0!	#DIV/0!	#DIV/0!	0	0	#DIV/0!	NA	NA	NA	0.121335	NA	NA	NA	NA	0.121335	NA	NA	NA	0.121335	NA	NA	0.121335	NA	NA	0.121335	0.121335
Fatty aldehydes	6728-26-3	3860.97	0	0	0	10782.8	0	2766.87	0	0	0	2.79277	0	0.716625	#DIV/0!	#DIV/0!	#DIV/0!	#DIV/0!	#DIV/0!	#DIV/0!	#DIV/0!	#DIV/0!	#DIV/0!	#DIV/0!	#DIV/0!	#DIV/0!	0	0.2566	#DIV/0!	0.036904	0.036904	0.036904	0.275234	0.121183	0.827259	NA	NA	0.036904	0.317311	0.036904	NA	0.036904	0.317311	0.036904	0.036904	0.317311	0.036904	0.0463016	0.275234
Fatty alcohols	928-96-1	32979.9	2702.41	19145.7	5656.74	217116	19526.4	38924.3	0.0819411	0.580525	0.171521	6.58327	0.592068	1.18024	7.08467	2.09322	80.3415	7.22554	14.4035	0.295458	11.3402	1.01988	2.03306	38.3818	3.45187	6.88104	0.0899352	0.179279	1.99342	0.12663	0.275234	0.12663	0.0495346	0.512691	0.275234	0.275234	0.657905	0.0495346	0.12663	0.12663	0.512691	0.0495346	0.827259	0.275234	0.0495346	0.512691	0.12663	0.0495346	0.0495346
Fatty alcohols	928-95-0	0	0	0	0	5773.15	0	0	#DIV/0!	#DIV/0!	#DIV/0!	#DIV/0!	#DIV/0!	#DIV/0!	#DIV/0!	#DIV/0!	#DIV/0!	#DIV/0!	#DIV/0!	#DIV/0!	#DIV/0!	#DIV/0!	#DIV/0!	#DIV/0!	#DIV/0!	#DIV/0!	0	0	#DIV/0!	0.317311	0.317311	0.317311	0.246315	0.317311	0.317311	NA	NA	0.121335	NA	NA	NA	0.121335	NA	NA	0.121335	NA	NA	0.121335	0.121335
Fatty alcohols	111-27-3	2507.68	0	0	0	19010.5	0	1999.26	0	0	0	7.58093	0	0.797256	#DIV/0!	#DIV/0!	#DIV/0!	#DIV/0!	#DIV/0!	#DIV/0!	#DIV/0!	#DIV/0!	#DIV/0!	#DIV/0!	#DIV/0!	#DIV/0!	0	0.105166	#DIV/0!	0.121335	0.121335	0.121335	0.275234	0.121335	0.512691	NA	NA	0.036904	NA	0.036904	NA	0.036904	NA	0.036904	0.036904	NA	0.036904	0.036904	0.0495346
Monoterpenoids	80-56-8	51656.9	39627.2	74331.6	56829	113307	89134.2	95650.5	0.767125	1.43895	1.10012	2.19346	1.72551	1.85165	1.87577	1.43409	2.85932	2.24932	2.41376	0.764534	1.52435	1.19914	1.28681	1.99383	1.56846	1.68313	0.786661	0.84417	1.07311	0.827259	0.0495346	0.827259	0.0495346	0.0495346	0.0495346	0.275234	0.827259	0.0495346	0.0495346	0.0495346	0.0495346	0.12663	0.512691	0.275234	0.0495346	0.0495346	0.0495346	0.275234	0.512691
Fatty alcohols	3391-86-4	448.496	0	0	0	21023.1	4022.67	8889.52	0	0	0	46.8746	8.96924	19.8207	#DIV/0!	#DIV/0!	#DIV/0!	#DIV/0!	#DIV/0!	#DIV/0!	#DIV/0!	#DIV/0!	#DIV/0!	#DIV/0!	#DIV/0!	#DIV/0!	0.191345	0.422845	2.20986	0.036904	0.506555	0.036904	0.0495346	0.12663	0.0495346	0.317311	NA	0.036904	0.036904	0.036904	0.317311	0.0463016	0.121183	0.0463016	0.036904	0.036904	0.036904	0.0495346	0.275234
Monoterpenoids	3387-41-5	52427.2	32396.5	77356.4	54816.6	136912	96326.5	130863	0.617932	1.4755	1.04558	2.61146	1.83734	2.49608	2.3878	1.69206	4.22613	2.97336	4.03941	0.708625	1.76988	1.24523	1.69169	2.49763	1.75725	2.38728	0.703566	0.955817	1.35853	0.512691	0.0495346	0.827259	0.0495346	0.0495346	0.0495346	0.12663	0.827259	0.0495346	0.0495346	0.0495346	0.0495346	0.0495346	0.512691	0.12663	0.0495346	0.0495346	0.0495346	0.0495346	0.512691
Monoterpenoids	18172-67-3	116368	71471.9	150629	129470	306624	219371	294443	0.614188	1.29442	1.11259	2.63495	1.88515	2.53027	2.10752	1.81148	4.29014	3.06933	4.1197	0.85953	2.03563	1.45637	1.95476	2.3683	1.69438	2.27422	0.715439	0.960272	1.34221	0.512691	0.12663	0.827259	0.0495346	0.0495346	0.0495346	0.275234	0.827259	0.0495346	0.0495346	0.0495346	0.12663	0.0495346	0.12663	0.0495346	0.0495346	0.0495346	0.0495346	0.12663	0.512691
Fatty aldehydes	124-13-0	2495.98	1806.1	5820.29	2637.82	3115.14	4461.33	3653.1	0.723606	2.33187	1.05683	1.24806	1.78741	1.46359	3.22257	1.4605	1.72478	2.47014	2.02264	0.453211	0.53522	0.766513	0.627649	1.18095	1.69129	1.38489	1.43215	1.17269	0.818837	0.512691	0.0495346	0.827259	0.275234	0.12663	0.275234	0.12663	0.827259	0.275234	0.512691	0.512691	0.0495346	0.275234	0.0495346	0.0495346	0.275234	0.275234	0.512691	0.827259	0.512691
Monoterpenoids	99-83-2	5314	933.265	4606.93	4976.74	12764.3	7652.64	9615.99	0.175624	0.866942	0.936534	2.40202	1.44009	1.80956	4.93636	5.33261	13.6771	8.19986	10.3036	1.08027	2.77069	1.66112	2.08729	2.5648	1.53768	1.93219	0.599533	0.753348	1.25656	0.512691	0.512691	0.512691	0.0495346	0.12663	0.0495346	0.827259	0.512691	0.0495346	0.275234	0.0495346	0.827259	0.0495346	0.0495346	0.0495346	0.0495346	0.0495346	0.0495346	0.12663	0.827259
Monoterpenoids	13466-78-9	40929.3	27827.5	37005	45150.3	79223.8	46880.6	49132.5	0.679893	0.90412	1.10313	1.93563	1.1454	1.20042	1.3298	1.62251	2.84696	1.68468	1.76561	1.22011	2.1409	1.26687	1.32773	1.75467	1.03832	1.0882	0.591749	0.620174	1.04804	0.827259	0.827259	0.827259	0.12663	0.512691	0.275234	0.512691	0.827259	0.12663	0.512691	0.275234	0.827259	0.12663	0.512691	0.275234	0.0495346	0.275234	0.0495346	0.12663	0.512691
Monoterpenoids	5989-27-5	14658	8683.42	21314.5	12821.2	37555.2	24386.7	42664.9	0.5924	1.45412	0.874689	2.56209	1.66371	2.91068	2.45462	1.47652	4.32494	2.80842	4.91337	0.601525	1.76196	1.14414	2.00168	2.92915	1.90206	3.32768	0.649355	1.13606	1.74951	0.275234	0.12663	0.275234	0.0495346	0.0495346	0.0495346	0.12663	0.827259	0.0495346	0.0495346	0.0495346	0.0495346	0.0495346	0.275234	0.0495346	0.0495346	0.0495346	0.0495346	0.0495346	0.827259
Monoterpenoids	470-82-6	739007	319923	655216	731922	2.07877e+06	1.19209e+06	2.01779e+06	0.43291	0.886617	0.990413	2.81292	1.6131	2.73041	2.04804	2.28781	6.49771	3.72617	6.30712	1.11707	3.17265	1.81938	3.07959	2.84015	1.62871	2.75684	0.57346	0.970668	1.69265	0.12663	0.512691	0.512691	0.0495346	0.0495346	0.0495346	0.275234	0.12663	0.0495346	0.0495346	0.0495346	0.512691	0.0495346	0.0495346	0.0495346	0.0495346	0.0495346	0.0495346	0.0495346	0.275234
Monoterpenoids	13877-91-3	250198	122485	244227	140175	623621	401971	782011	0.489552	0.976135	0.560255	2.49251	1.60661	3.12557	1.99394	1.14442	5.09141	3.2818	6.38455	0.573952	2.55345	1.64589	3.20198	4.44889	2.86765	5.57884	0.644576	1.25399	1.94544	0.12663	0.827259	0.12663	0.0495346	0.12663	0.0495346	0.12663	0.827259	0.0495346	0.0495346	0.0495346	0.12663	0.0495346	0.12663	0.0495346	0.0495346	0.0495346	0.0495346	0.0495346	0.827259
Monoterpenoids	4821-4-9	16569.7	7563.5	17045.9	17418.6	48874.2	22793.8	32514.7	0.456466	1.02874	1.05123	2.94961	1.37563	1.9623	2.25371	2.30298	6.46184	3.01365	4.2989	1.02186	2.86721	1.3372	1.90748	2.80586	1.30859	1.86667	0.466376	0.665275	1.42648	0.12663	0.512691	0.827259	0.0495346	0.275234	0.0495346	0.12663	0.275234	0.0495346	0.12663	0.0495346	0.827259	0.0495346	0.512691	0.0495346	0.0495346	0.275234	0.0495346	0.0495346	0.275234
Monoterpenoids	673-84-7	74668.4	35472.2	57033.2	64737.1	179063	91716.3	138532	0.475063	0.763819	0.866994	2.3981	1.22831	1.85529	1.60783	1.82501	5.04797	2.58558	3.90536	1.13508	3.13962	1.60812	2.42897	2.766	1.41675	2.13991	0.512203	0.77365	1.51044	0.275234	0.512691	0.512691	0.0495346	0.512691	0.12663	0.275234	0.512691	0.0495346	0.12663	0.0495346	0.827259	0.0495346	0.12663	0.0495346	0.0495346	0.12663	0.0495346	0.0495346	0.512691
Monoterpenoids	78-70-6	8741.37	892.688	4090.89	6756.77	38416.2	9100.26	12485.9	0.102122	0.467992	0.772965	4.39476	1.04106	1.42836	4.58267	7.56902	43.0343	10.1942	13.9868	1.65166	9.39067	2.22452	3.05211	5.68558	1.34684	1.8479	0.236886	0.325015	1.37203	0.12663	0.12663	0.512691	0.0495346	0.512691	0.12663	0.275234	0.12663	0.0495346	0.0495346	0.0495346	0.275234	0.0495346	0.0495346	0.0495346	0.0495346	0.12663	0.0495346	0.0495346	0.0495346
Monoterpenoids	5986-38-9	6089.61	0	4007.59	6327.35	21120.2	7718.35	9057.83	0	0.658104	1.03904	3.46824	1.26746	1.48742	#DIV/0!	#DIV/0!	#DIV/0!	#DIV/0!	#DIV/0!	1.57884	5.27005	1.92593	2.26017	3.33792	1.21984	1.43153	0.365449	0.42887	1.17354	0.0463016	0.827259	0.827259	0.0495346	0.275234	0.0495346	0.0463016	0.121183	0.0463016	0.0463016	0.0463016	0.512691	0.0495346	0.512691	0.0495346	0.0495346	0.512691	0.0495346	0.0495346	0.0495346
Monoterpenoids	98-55-5	35295.6	13268.6	34537.7	41408.2	139580	47360.8	55315.6	0.375927	0.978527	1.17318	3.9546	1.34183	1.56721	2.60297	3.12077	10.5196	3.56939	4.16891	1.19893	4.04139	1.37128	1.6016	3.37083	1.14375	1.33586	0.339309	0.3963	1.16796	0.0495346	0.827259	0.827259	0.0495346	0.512691	0.0495346	0.0495346	0.12663	0.0495346	0.0495346	0.0495346	0.512691	0.0495346	0.512691	0.0495346	0.0495346	0.512691	0.0495346	0.0495346	0.12663
Phenylpropanoids	140-67-0	69123.9	19671.6	43900.4	28324.1	185591	89114.4	130437	0.284585	0.635098	0.409759	2.68491	1.2892	1.887	2.23167	1.43985	9.43448	4.53011	6.63072	0.64519	4.22755	2.02992	2.9712	6.55241	3.14624	4.60515	0.480165	0.702818	1.4637	0.0495346	0.0495346	0.12663	0.0495346	0.512691	0.0495346	0.275234	0.512691	0.0495346	0.0495346	0.0495346	0.512691	0.0495346	0.0495346	0.0495346	0.0495346	0.0495346	0.0495346	0.0495346	0.12663
Monoterpenoids	10032-15-2	645.474	983.246	0	0	303.798	0	1367.09	1.52329	0	0	0.470659	0	2.11796	0	0	0.308975	0	1.39038	#DIV/0!	#DIV/0!	#DIV/0!	#DIV/0!	#DIV/0!	#DIV/0!	#DIV/0!	0	4.49999	#DIV/0!	0.827259	0.036904	0.036904	0.275234	0.0463016	0.827259	0.121335	0.121335	1	0.246315	0.657905	NA	0.121335	0.317311	0.121335	0.121335	0.317311	0.121335	0.486674	1
NA	272-16-2	22694.1	35413.4	32879.7	34064.3	21603.4	24557.7	20114.7	1.56047	1.44882	1.50102	0.95194	1.08212	0.886341	0.928455	0.961905	0.610036	0.693457	0.567998	1.03603	0.657044	0.746894	0.611767	0.634196	0.720921	0.590493	1.13675	0.93109	0.819082	0.0495346	0.0495346	0.0495346	0.275234	0.0495346	0.275234	0.512691	0.512691	0.0495346	0.0495346	0.0495346	0.827259	0.0495346	0.0495346	0.0495346	0.0495346	0.0495346	0.0495346	0.0495346	0.275234
Phenylpropanoids	97-53-0	22500.5	23946.6	15271.2	16142.6	74464.9	29566.2	46755.8	1.06427	0.678705	0.717436	3.30948	1.31402	2.07799	0.637719	0.674111	3.10963	1.23467	1.95251	1.05707	4.87617	1.93607	3.0617	4.61293	1.83156	2.89642	0.397048	0.627891	1.5814	0.827259	0.0495346	0.0495346	0.0495346	0.827259	0.12663	0.275234	0.275234	0.0495346	0.275234	0.0495346	0.512691	0.0495346	0.275234	0.0495346	0.0495346	0.275234	0.0495346	0.0495346	0.12663
Phenylpropanoids	1754-62-7	57267.1	20299.5	29278.2	9666.31	38211.9	32969.5	57531.1	0.354471	0.511257	0.168793	0.667258	0.575714	1.00461	1.44231	0.476184	1.88241	1.62415	2.83411	0.330153	1.30513	1.12607	1.96498	3.95311	3.41076	5.95172	0.862806	1.50558	1.74498	0.0495346	0.0495346	0.0495346	0.275234	0.0495346	0.827259	0.12663	0.0495346	0.12663	0.12663	0.0495346	0.0495346	0.275234	0.512691	0.0495346	0.0495346	0.0495346	0.0495346	0.275234	0.275234
Phenylpropanoids	93-15-2	3.07795e+07	2.62464e+07	3.89467e+07	4.09372e+07	4.71773e+07	3.452e+07	3.52902e+07	0.852722	1.26535	1.33002	1.53275	1.12152	1.14655	1.48389	1.55973	1.79748	1.31523	1.34457	1.05111	1.21133	0.886338	0.906114	1.15243	0.843242	0.862057	0.731706	0.748033	1.02231	0.275234	0.0495346	0.512691	0.0495346	0.275234	0.0495346	0.0495346	0.275234	0.0495346	0.275234	0.0495346	0.512691	0.0495346	0.275234	0.827259	0.0495346	0.512691	0.512691	0.0495346	0.0495346
Sesquiterpenoids	17334-55-3	17514.2	7725.81	14277	16634	44343.4	21981	38079.3	0.441118	0.815168	0.949743	2.53186	1.25504	2.1742	1.84796	2.15304	5.73964	2.84514	4.92884	1.16509	3.10593	1.53961	2.66718	2.66583	1.32145	2.28925	0.4957	0.858736	1.73237	0.0495346	0.827259	0.275234	0.0495346	0.275234	0.0495346	0.0495346	0.12663	0.0495346	0.0495346	0.0495346	0.827259	0.0495346	0.12663	0.0495346	0.0495346	0.0495346	0.0495346	0.0495346	0.512691
Sesquiterpenoids	17699-05-7	2.2061e+06	840214	1.5275e+06	1.89483e+06	4.77172e+06	2.46916e+06	4.24542e+06	0.380859	0.692399	0.858904	2.16296	1.11924	1.9244	1.81799	2.25518	5.67917	2.93873	5.05279	1.24048	3.12386	1.61647	2.77932	2.51828	1.3031	2.24053	0.517457	0.889706	1.71938	0.0495346	0.512691	0.275234	0.0495346	0.275234	0.0495346	0.12663	0.12663	0.0495346	0.0495346	0.0495346	0.827259	0.0495346	0.275234	0.0495346	0.0495346	0.0495346	0.0495346	0.0495346	0.275234
Sesquiterpenoids	28973-97-9	655026	157438	369302	458137	1.51181e+06	587117	1.11857e+06	0.240353	0.563798	0.699419	2.30802	0.896326	1.70767	2.3457	2.90996	9.60262	3.7292	7.10483	1.24055	4.09371	1.5898	3.02887	3.29992	1.28153	2.44156	0.388352	0.739884	1.90519	0.0495346	0.512691	0.275234	0.0495346	0.512691	0.0495346	0.0495346	0.12663	0.0495346	0.0495346	0.0495346	0.827259	0.0495346	0.512691	0.0495346	0.0495346	0.0495346	0.0495346	0.0495346	0.12663
Sesquiterpenoids	6753-98-6	359502	139178	214888	161759	572874	265382	546904	0.387142	0.597738	0.449955	1.59352	0.738193	1.52128	1.54398	1.16225	4.11612	1.90678	3.92953	0.752762	2.66592	1.23498	2.54507	3.54152	1.64059	3.38097	0.463246	0.954668	2.06082	0.12663	0.512691	0.0495346	0.12663	0.275234	0.0495346	0.275234	0.827259	0.0495346	0.12663	0.0495346	0.0495346	0.12663	0.827259	0.0495346	0.0495346	0.0495346	0.0495346	0.0495346	0.827259
Sesquiterpenoids	54274-73-6	5769.93	0	4564.51	1577.46	25764.8	14354.4	24109.6	0	0.791085	0.273393	4.46536	2.48779	4.17848	#DIV/0!	#DIV/0!	#DIV/0!	#DIV/0!	#DIV/0!	0.345592	5.64461	3.14478	5.28196	16.3332	9.09969	15.2838	0.55713	0.935754	1.6796	0.0463016	0.512691	0.12663	0.0495346	0.12663	0.0495346	0.0463016	0.0463016	0.0463016	0.0463016	0.0463016	0.275234	0.0495346	0.0495346	0.0495346	0.0495346	0.0495346	0.0495346	0.0495346	0.275234
Sesquiterpenoids	87-44-5	44655.4	12051.3	24874.4	29183	114753	49823.6	90093.9	0.269873	0.557031	0.653515	2.56975	1.11574	2.01754	2.06405	2.42156	9.52205	4.1343	7.47587	1.17321	4.61329	2.00301	3.62195	3.93219	1.70729	3.08721	0.434182	0.785112	1.80826	0.0495346	0.275234	0.12663	0.0495346	0.827259	0.0495346	0.0495346	0.12663	0.0495346	0.0495346	0.0495346	0.827259	0.0495346	0.275234	0.0495346	0.0495346	0.0495346	0.0495346	0.0495346	0.512691
Sesquiterpenoids	13744-15-5	185702	55947.2	116690	149122	627173	273841	495467	0.301275	0.628372	0.803021	3.37732	1.47463	2.66808	2.08571	2.66541	11.2101	4.89464	8.85597	1.27794	5.37471	2.34675	4.24602	4.20577	1.83635	3.32255	0.436628	0.79	1.80932	0.0495346	0.275234	0.275234	0.0495346	0.827259	0.0495346	0.0495346	0.12663	0.0495346	0.0495346	0.0495346	0.827259	0.0495346	0.12663	0.0495346	0.0495346	0.0495346	0.0495346	0.0495346	0.827259
Sesquiterpenoids	3853-83-6	17152.6	2767.33	8413.63	8868.81	41219.1	17219.5	31480.8	0.161336	0.490517	0.517054	2.40308	1.0039	1.83534	3.04034	3.20482	14.8949	6.22241	11.3759	1.0541	4.89908	2.04662	3.74165	4.64764	1.94158	3.54961	0.417755	0.763745	1.82821	0.0495346	0.275234	0.0495346	0.0495346	0.827259	0.0495346	0.12663	0.12663	0.0495346	0.0495346	0.0495346	0.827259	0.0495346	0.275234	0.0495346	0.0495346	0.0495346	0.0495346	0.0495346	0.12663
Sesquiterpenoids	3242-4-4	3572.37	0	403.854	0	27412.4	6645.61	20688.4	0	0.113049	0	7.67345	1.86028	5.79122	#DIV/0!	#DIV/0!	#DIV/0!	#DIV/0!	#DIV/0!	0	67.877	16.4555	51.2274	#DIV/0!	#DIV/0!	#DIV/0!	0.242431	0.754709	3.11309	0.036904	0.275234	0.036904	0.0495346	0.512691	0.0495346	0.121335	NA	0.036904	0.036904	0.036904	0.121335	0.0495346	0.12663	0.0495346	0.036904	0.036904	0.036904	0.0495346	0.275234
Sesquiterpenoids	3691-11-0	6477.41	0	1443.4	1785.95	37388.2	11825.5	23814.1	0	0.222837	0.275719	5.77208	1.82566	3.67649	#DIV/0!	#DIV/0!	#DIV/0!	#DIV/0!	#DIV/0!	1.23732	25.9028	8.19281	16.4986	20.9346	6.62144	13.3342	0.316291	0.636944	2.01379	0.036904	0.275234	0.0495346	0.0495346	0.275234	0.0495346	0.036904	0.121335	0.036904	0.036904	0.036904	0.827259	0.0495346	0.12663	0.0495346	0.0495346	0.0495346	0.0495346	0.0495346	0.275234
Sesquiterpenoids	30021-74-0	45902.6	9381.34	29145.1	31286.2	193973	83224.1	158775	0.204375	0.634934	0.681578	4.22575	1.81306	3.45894	3.10671	3.33494	20.6765	8.87124	16.9245	1.07346	6.65542	2.85551	5.44773	6.19995	2.66009	5.07491	0.42905	0.81854	1.9078	0.0495346	0.275234	0.12663	0.0495346	0.12663	0.0495346	0.0495346	0.0495346	0.0495346	0.0495346	0.0495346	0.827259	0.0495346	0.12663	0.0495346	0.0495346	0.0495346	0.0495346	0.0495346	0.512691
Sesquiterpenoids	39029-41-9	45247.6	9381.34	29145.1	31286.2	193916	83010.7	158685	0.207334	0.644126	0.691445	4.28567	1.83459	3.50705	3.10671	3.33494	20.6704	8.84848	16.915	1.07346	6.65346	2.84818	5.44466	6.19813	2.65326	5.07205	0.428075	0.81832	1.91163	0.0495346	0.275234	0.12663	0.0495346	0.12663	0.0495346	0.0495346	0.0495346	0.0495346	0.0495346	0.0495346	0.827259	0.0495346	0.12663	0.0495346	0.0495346	0.0495346	0.0495346	0.0495346	0.512691
Sesquiterpenoids	483-76-1	4030.04	0	456.206	1010	8390.62	5828.77	6942.81	0	0.113201	0.250619	2.08202	1.44633	1.72276	#DIV/0!	#DIV/0!	#DIV/0!	#DIV/0!	#DIV/0!	2.21392	18.3922	12.7766	15.2186	8.30752	5.77104	6.87404	0.694677	0.827449	1.19113	0.036904	0.275234	0.12663	0.0495346	0.512691	0.0495346	0.121335	0.036904	0.036904	0.036904	0.036904	0.827259	0.0495346	0.12663	0.0495346	0.0495346	0.0495346	0.0495346	0.0495346	0.275234
Sesquiterpenoids	483-77-2	0	0	0	0	8813.76	2631.15	6289.3	#DIV/0!	#DIV/0!	#DIV/0!	#DIV/0!	#DIV/0!	#DIV/0!	#DIV/0!	#DIV/0!	#DIV/0!	#DIV/0!	#DIV/0!	#DIV/0!	#DIV/0!	#DIV/0!	#DIV/0!	#DIV/0!	#DIV/0!	#DIV/0!	0.298528	0.713577	2.39032	0.317311	0.317311	0.317311	0.0463016	0.121183	0.0463016	NA	NA	0.036904	0.036904	0.036904	NA	0.036904	0.036904	0.036904	0.036904	0.036904	0.036904	0.0495346	0.275234
[truncated: 22 more columns]

## Sheet: Table S4
																																										Method RT
Description	EXPERIMENT	EXP	ID	BIO	COLLECTION	COLLECTION DATE	COLLECTION DATE	COLLECTION TIME	Seed/Cutting Date	HARVEST DATE	Treatment Age (wk)	Treatment Duration (wk)	Post Treatment (hr or wk)	Age at Collection	GENOTYPE	Origin	Sample Tissue	Tissue Count	TREATMENT	Wavelength 1	INTENSITY 1	Wavelength 2	Intesnsity 2	Wavelength 3	Intesnsity 3	TEMPERATURE	REPLICATE	SAMPLE	MASS I	Nodes	MASS F	Collection Duration (hours	NOTE	NA Area Std	NA Area Sample		Name	Data File	Type	Level	Acq. Date-Time	110-82-7 Method	616-25-1 Method	105-37-3 Method	109-60-4 Method	623-42-7 Method	137-32-6 Method	97-62-1 Method	108-88-3 Method
Germination under treatments. Microgreen production.	MICROGREEN	MICRO	MICRO_01_01_GH	01	01	2014-10-08	20141008	11:00:00	2014-09-17	2014-10-08	0	3	-	3	Ceasar	Seed	Seedlings	5	GH	Sun	-	-	-	-	-	MH + GH	A	1	1.55	-	-	2		6404701	7644060		20141008 01	20141008 01.D	Sample		2014-10-15 11:08:00	4.85	5.16	5.97	6.03	6.28	6.72	7.4	7.8
	MICROGREEN	MICRO	MICRO_01_01_GH	01	01	2014-10-08	20141008	11:00:00	2014-09-17	2014-10-08	0	3	-	3	Ceasar	Seed	Seedlings	5	GH	Sun	-	-	-	-	-	MH + GH	B	2	1.61	-	-	2		6404701	8754078		20141008 02	20141008 02.D	Sample		2014-10-15 12:07:00	4.85	5.16	5.97	6.03	6.28	6.72	7.4	7.8
	MICROGREEN	MICRO	MICRO_01_01_GH	01	01	2014-10-08	20141008	11:00:00	2014-09-17	2014-10-08	0	3	-	3	Ceasar	Seed	Seedlings	5	GH	Sun	-	-	-	-	-	MH + GH	C	3	1.39	-	-	2		6404701	7604008		20141008 03	20141008 03.D	Sample		2014-10-15 13:06:00	4.85	5.16	5.97	6.03	6.28	6.72	7.4	7.8
	MICROGREEN	MICRO	MICRO_01_01_R	01	01	2014-10-08	20141008	11:00:00	2014-09-17	2014-10-08	0	3	-	3	Ceasar	Seed	Seedlings	6	R	660	100	-	-	-	-	Trtmt	A	4	0.94	-	-	2		6404701	7211405		20141008 04	20141008 04.D	Sample		2014-10-15 14:04:00	4.85	5.16	5.97	6.03	6.28	6.72	7.4	7.8
	MICROGREEN	MICRO	MICRO_01_01_R	01	01	2014-10-08	20141008	11:00:00	2014-09-17	2014-10-08	0	3	-	3	Ceasar	Seed	Seedlings	6	R	660	100	-	-	-	-	Trtmt	B	5	0.87	-	-	2		6404701	7627013		20141008 05	20141008 05.D	Sample		2014-10-15 15:03:00	4.85	5.16	5.97	6.03	6.28	6.72	7.4	7.8
	MICROGREEN	MICRO	MICRO_01_01_R	01	01	2014-10-08	20141008	11:00:00	2014-09-17	2014-10-08	0	3	-	3	Ceasar	Seed	Seedlings	6	R	660	100	-	-	-	-	Trtmt	C	6	0.85	-	-	2		6404701	8598151		20141008 06	20141008 06.D	Sample		2014-10-15 16:02:00	4.85	5.16	5.97	6.03	6.28	6.72	7.4	7.8
	MICROGREEN	MICRO	MICRO_01_01_B	01	01	2014-10-08	20141008	11:00:00	2014-09-17	2014-10-08	0	3	-	3	Ceasar	Seed	Seedlings	7	B	470	100	-	-	-	-	Trtmt	A	7	0.91	-	-	2		6404701	7867384		20141008 07	20141008 07.D	Sample		2014-10-15 17:01:00	4.85	5.16	5.97	6.03	6.28	6.72	7.4	7.8
	MICROGREEN	MICRO	MICRO_01_01_B	01	01	2014-10-08	20141008	11:00:00	2014-09-17	2014-10-08	0	3	-	3	Ceasar	Seed	Seedlings	6	B	470	100	-	-	-	-	Trtmt	B	8	0.83	-	-	2		6404701	8129901		20141008 08	20141008 08.D	Sample		2014-10-15 18:00:00	4.85	5.16	5.97	6.03	6.28	6.72	7.4	7.8
	MICROGREEN	MICRO	MICRO_01_01_B	01	01	2014-10-08	20141008	11:00:00	2014-09-17	2014-10-08	0	3	-	3	Ceasar	Seed	Seedlings	8	B	470	100	-	-	-	-	Trtmt	C	9	0.86	-	-	2		6404701	6411095		20141008 09	20141008 09.D	Sample		2014-10-15 18:59:00	4.85	5.16	5.97	6.03	6.28	6.72	7.4	7.8
	MICROGREEN	MICRO	MICRO_01_01_RB	01	01	2014-10-08	20141008	11:00:00	2014-09-17	2014-10-08	0	3	-	3	Ceasar	Seed	Seedlings	4	RB	660	50	470	50	-	-	Trtmt	A	10	0.62	-	-	2		6404701	8330450		20141008 10	20141008 10.D	Sample		2014-10-15 19:57:00	4.85	5.16	5.97	6.03	6.28	6.72	7.4	7.8
	MICROGREEN	MICRO	MICRO_01_01_RB	01	01	2014-10-08	20141008	11:00:00	2014-09-17	2014-10-08	0	3	-	3	Ceasar	Seed	Seedlings	4	RB	660	50	470	50	-	-	Trtmt	B	11	0.7	-	-	2		6404701	8818138		20141008 11	20141008 11.D	Sample		2014-10-15 20:56:00	4.85	5.16	5.97	6.03	6.28	6.72	7.4	7.8
	MICROGREEN	MICRO	MICRO_01_01_RB	01	01	2014-10-08	20141008	11:00:00	2014-09-17	2014-10-08	0	3	-	3	Ceasar	Seed	Seedlings	5	RB	660	50	470	50	-	-	Trtmt	C	12	0.625	-	-	2		6404701	6531424		20141008 12	20141008 12.D	Sample		2014-10-15 21:55:00	4.85	5.16	5.97	6.03	6.28	6.72	7.4	7.8
	MICROGREEN	MICRO	MICRO_01_01_RBG	01	01	2014-10-08	20141008	11:00:00	2014-09-17	2014-10-08	0	3	-	3	Ceasar	Seed	Seedlings	9	RBG	660	50	470	50	525	50	Trtmt	A	13	1.78	-	-	2		6404701	9053302		20141008 13	20141008 13.D	Sample		2014-10-15 22:54:00	4.85	5.16	5.97	6.03	6.28	6.72	7.4	7.8
	MICROGREEN	MICRO	MICRO_01_01_RBG	01	01	2014-10-08	20141008	11:00:00	2014-09-17	2014-10-08	0	3	-	3	Ceasar	Seed	Seedlings	8	RBG	660	50	470	50	525	50	Trtmt	B	14	1.81	-	-	2		6404701	9476551		20141008 14	20141008 14.D	Sample		2014-10-15 23:53:00	4.85	5.16	5.97	6.03	6.28	6.72	7.4	7.8
	MICROGREEN	MICRO	MICRO_01_01_RBG	01	01	2014-10-08	20141008	11:00:00	2014-09-17	2014-10-08	0	3	-	3	Ceasar	Seed	Seedlings	9	RBG	660	50	470	50	525	50	Trtmt	C	15	1.75	-	-	2		6404701	8023012		20141008 15	20141008 15.D	Sample		2014-10-16 00:52:00	4.85	5.16	5.97	6.03	6.28	6.72	7.4	7.8
	MICROGREEN	MICRO	MICRO_01_01_RBY	01	01	2014-10-08	20141008	11:00:00	2014-09-17	2014-10-08	0	3	-	3	Ceasar	Seed	Seedlings	8	RBY	660	50	470	50	580	50	Trtmt	A	16	2.3	-	-	2		6404701	8864952		20141008 16	20141008 16.D	Sample		2014-10-16 01:50:00	4.85	5.16	5.97	6.03	6.28	6.72	7.4	7.8
	MICROGREEN	MICRO	MICRO_01_01_RBY	01	01	2014-10-08	20141008	11:00:00	2014-09-17	2014-10-08	0	3	-	3	Ceasar	Seed	Seedlings	7	RBY	660	50	470	50	580	50	Trtmt	B	17	2.26	-	-	2		6404701	8311665		20141008 17	20141008 17.D	Sample		2014-10-16 02:49:00	4.85	5.16	5.97	6.03	6.28	6.72	7.4	7.8
	MICROGREEN	MICRO	MICRO_01_01_RBY	01	01	2014-10-08	20141008	11:00:00	2014-09-17	2014-10-08	0	3	-	3	Ceasar	Seed	Seedlings	6	RBY	660	50	470	50	580	50	Trtmt	C	18	2.49	-	-	2		6404701	7288315		20141008 18	20141008 18.D	Sample		2014-10-16 03:48:00	4.85	5.16	5.97	6.03	6.28	6.72	7.4	7.8
	MICROGREEN	MICRO	MICRO_01_01_RBFr	01	01	2014-10-08	20141008	11:00:00	2014-09-17	2014-10-08	0	3	-	3	Ceasar	Seed	Seedlings	5	RBFr	660	50	470	50	730	50	Trtmt	A	19	0.985	-	-	2		6404701	7873746		20141008 19	20141008 19.D	Sample		2014-10-16 04:47:00	4.85	5.16	5.97	6.03	6.28	6.72	7.4	7.8
	MICROGREEN	MICRO	MICRO_01_01_RBFr	01	01	2014-10-08	20141008	11:00:00	2014-09-17	2014-10-08	0	3	-	3	Ceasar	Seed	Seedlings	5	RBFr	660	50	470	50	730	50	Trtmt	B	20	0.995	-	-	2		6404701	8351580		20141008 20	20141008 20.D	Sample		2014-10-16 05:45:00	4.85	5.16	5.97	6.03	6.28	6.72	7.4	7.8
	MICROGREEN	MICRO	MICRO_01_01_RBFr	01	01	2014-10-08	20141008	11:00:00	2014-09-17	2014-10-08	0	3	-	3	Ceasar	Seed	Seedlings	6	RBFr	660	50	470	50	730	50	Trtmt	C	21	0.976	-	-	2		6404701	7270422		20141008 21	20141008 21.D	Sample		2014-10-16 06:44:00	4.85	5.16	5.97	6.03	6.28	6.72	7.4	7.8
One week in GH post germination under treatments. Microgreen production.	MICROGREEN	MICRO	MICRO_01_02_MeCl	01	02	2014-10-16	20141016	14:00:00	-	-	-	-	-	-	-	-	-	-	MeCl	-	-	-	-	-	-	-	-	MeCl	1	-	-	1		143150	0		20141016 MeCl	20141016 MeCl.D	Sample		2014-11-17 17:41:00	4.85	5.16	5.97	6.03	6.28	6.72	7.4	7.8
	MICROGREEN	MICRO	MICRO_01_02_RBG	01	02	2014-10-16	20141016	14:00:00	2014-09-17	2014-10-16	0	3	1	4	Ceasar	Seed	Sprig	1	RBG	660	50	470	50	525	50	Trtmt + GH	A	1	1.13	-	-	2	Cut off above the node. First true leaf for AOX.	143150	107507		20141016 01	20141016 01.D	Sample		2014-11-17 18:39:00	4.85	5.16	5.97	6.03	6.28	6.72	7.4	7.8
	MICROGREEN	MICRO	MICRO_01_02_RBG	01	02	2014-10-16	20141016	14:00:00	2014-09-17	2014-10-16	0	3	1	4	Ceasar	Seed	Sprig	1	RBG	660	50	470	50	525	50	Trtmt + GH	B	2	1.21	-	-	2		143150	201379		20141016 02	20141016 02.D	Sample		2014-11-17 19:37:00	4.85	5.16	5.97	6.03	6.28	6.72	7.4	7.8
	MICROGREEN	MICRO	MICRO_01_02_RBG	01	02	2014-10-16	20141016	14:00:00	2014-09-17	2014-10-16	0	3	1	4	Ceasar	Seed	Sprig	1	RBG	660	50	470	50	525	50	Trtmt + GH	C	3	1.12	-	-	2		143150	167825		20141016 03	20141016 03.D	Sample		2014-11-17 20:34:00	4.85	5.16	5.97	6.03	6.28	6.72	7.4	7.8
	MICROGREEN	MICRO	MICRO_01_02_RBY	01	02	2014-10-16	20141016	14:00:00	2014-09-17	2014-10-16	0	3	1	4	Ceasar	Seed	Sprig	1	RBY	660	50	470	50	580	50	Trtmt + GH	A	4	1.52	-	-	2		143150	177924		20141016 04	20141016 04.D	Sample		2014-11-17 21:32:00	4.85	5.16	5.97	6.03	6.28	6.72	7.4	7.8
	MICROGREEN	MICRO	MICRO_01_02_RBY	01	02	2014-10-16	20141016	14:00:00	2014-09-17	2014-10-16	0	3	1	4	Ceasar	Seed	Sprig	1	RBY	660	50	470	50	580	50	Trtmt + GH	B	5	1.8	-	-	2		143150	196272		20141016 05	20141016 05.D	Sample		2014-11-17 22:30:00	4.85	5.16	5.97	6.03	6.28	6.72	7.4	7.8
	MICROGREEN	MICRO	MICRO_01_02_RBY	01	02	2014-10-16	20141016	14:00:00	2014-09-17	2014-10-16	0	3	1	4	Ceasar	Seed	Sprig	1	RBY	660	50	470	50	580	50	Trtmt + GH	C	6	2.38	-	-	2		143150	196255		20141016 06	20141016 06.D	Sample		2014-11-17 23:28:00	4.85	5.16	5.97	6.03	6.28	6.72	7.4	7.8
	MICROGREEN	MICRO	MICRO_01_02_RBFr	01	02	2014-10-16	20141016	14:00:00	2014-09-17	2014-10-16	0	3	1	4	Ceasar	Seed	Sprig	1	RBFr	660	50	470	50	730	50	Trtmt + GH	A	7	1.1	-	-	2		143150	171485		20141016 07	20141016 07.D	Sample		2014-11-18 00:25:00	4.85	5.16	5.97	6.03	6.28	6.72	7.4	7.8
	MICROGREEN	MICRO	MICRO_01_02_RBFr	01	02	2014-10-16	20141016	14:00:00	2014-09-17	2014-10-16	0	3	1	4	Ceasar	Seed	Sprig	1	RBFr	660	50	470	50	730	50	Trtmt + GH	B	8	1.29	-	-	2		143150	227268		20141016 08	20141016 08.D	Sample		2014-11-18 01:23:00	4.85	5.16	5.97	6.03	6.28	6.72	7.4	7.8
	MICROGREEN	MICRO	MICRO_01_02_RBFr	01	02	2014-10-16	20141016	14:00:00	2014-09-17	2014-10-16	0	3	1	4	Ceasar	Seed	Sprig	1	RBFr	660	50	470	50	730	50	Trtmt + GH	C	9	1.05	-	-	2		143150	234318		20141016 09	20141016 09.D	Sample		2014-11-18 02:20:00	4.85	5.16	5.97	6.03	6.28	6.72	7.4	7.8
	MICROGREEN	MICRO	MICRO_01_02_RB	01	02	2014-10-16	20141016	14:00:00	2014-09-17	2014-10-16	0	3	1	4	Ceasar	Seed	Sprig	1	RB	660	50	470	50	-	-	Trtmt + GH	A	10	1.11	-	-	2		143150	232278		20141016 10	20141016 10.D	Sample		2014-11-18 03:18:00	4.85	5.16	5.97	6.03	6.28	6.72	7.4	7.8
	MICROGREEN	MICRO	MICRO_01_02_RB	01	02	2014-10-16	20141016	14:00:00	2014-09-17	2014-10-16	0	3	1	4	Ceasar	Seed	Sprig	1	RB	660	50	470	50	-	-	Trtmt + GH	B	11	0.82	-	-	2		143150	177617		20141016 11	20141016 11.D	Sample		2014-11-18 04:16:00	4.85	5.16	5.97	6.03	6.28	6.72	7.4	7.8
	MICROGREEN	MICRO	MICRO_01_02_RB	01	02	2014-10-16	20141016	14:00:00	2014-09-17	2014-10-16	0	3	1	4	Ceasar	Seed	Sprig	1	RB	660	50	470	50	-	-	Trtmt + GH	C	12	1.07	-	-	2		143150	366642		20141016 12	20141016 12.D	Sample		2014-11-18 05:13:00	4.85	5.16	5.97	6.03	6.28	6.72	7.4	7.8
	MICROGREEN	MICRO	MICRO_01_02_B	01	02	2014-10-16	20141016	14:00:00	2014-09-17	2014-10-16	0	3	1	4	Ceasar	Seed	Sprig	1	B	470	100	-	-	-	-	Trtmt + GH	A	13	1.01	-	-	2		143150	181704		20141016 13	20141016 13.D	Sample		2014-11-18 06:11:00	4.85	5.16	5.97	6.03	6.28	6.72	7.4	7.8
	MICROGREEN	MICRO	MICRO_01_02_B	01	02	2014-10-16	20141016	14:00:00	2014-09-17	2014-10-16	0	3	1	4	Ceasar	Seed	Sprig	1	B	470	100	-	-	-	-	Trtmt + GH	B	14	0.8	-	-	2		143150	285619		20141016 14	20141016 14.D	Sample		2014-11-18 07:09:00	4.85	5.16	5.97	6.03	6.28	6.72	7.4	7.8
	MICROGREEN	MICRO	MICRO_01_02_B	01	02	2014-10-16	20141016	14:00:00	2014-09-17	2014-10-16	0	3	1	4	Ceasar	Seed	Sprig	1	B	470	100	-	-	-	-	Trtmt + GH	C	15	0.77	-	-	2		143150	198917		20141016 15	20141016 15.D	Sample		2014-11-18 08:06:00	4.85	5.16	5.97	6.03	6.28	6.72	7.4	7.8
	MICROGREEN	MICRO	MICRO_01_02_GH	01	02	2014-10-16	20141016	14:00:00	2014-09-17	2014-10-16	-	-	-	4	Ceasar	Seed	Sprig	1	GH	Sun	-	-	-	-	-	MH + GH	A	16	1.55	-	-	2		143150	197902		20141016 16	20141016 16.D	Sample		2014-11-18 09:04:00	4.85	5.16	5.97	6.03	6.28	6.72	7.4	7.8
	MICROGREEN	MICRO	MICRO_01_02_GH	01	02	2014-10-16	20141016	14:00:00	2014-09-17	2014-10-16	-	-	-	4	Ceasar	Seed	Sprig	1	GH	Sun	-	-	-	-	-	MH + GH	B	17	1.47	-	-	2		143150	259685		20141016 17	20141016 17.D	Sample		2014-11-18 10:02:00	4.85	5.16	5.97	6.03	6.28	6.72	7.4	7.8
	MICROGREEN	MICRO	MICRO_01_02_GH	01	02	2014-10-16	20141016	14:00:00	2014-09-17	2014-10-16	-	-	-	4	Ceasar	Seed	Sprig	1	GH	Sun	-	-	-	-	-	MH + GH	C	18	1.7	-	-	2		143150	266101		20141016 18	20141016 18.D	Sample		2014-11-18 10:59:00	4.85	5.16	5.97	6.03	6.28	6.72	7.4	7.8
	MICROGREEN	MICRO	MICRO_01_02_R	01	02	2014-10-16	20141016	14:00:00	2014-09-17	2014-10-16	0	3	1	4	Ceasar	Seed	Sprig	1	R	660	100	-	-	-	-	Trtmt + GH	A	19	0.79	-	-	2		143150	208062		20141016 19	20141016 19.D	Sample		2014-11-18 11:57:00	4.85	5.16	5.97	6.03	6.28	6.72	7.4	7.8
	MICROGREEN	MICRO	MICRO_01_02_R	01	02	2014-10-16	20141016	14:00:00	2014-09-17	2014-10-16	0	3	1	4	Ceasar	Seed	Sprig	1	R	660	100	-	-	-	-	Trtmt + GH	B	20	0.97	-	-	2		143150	204916		20141016 20	20141016 20.D	Sample		2014-11-18 12:55:00	4.85	5.16	5.97	6.03	6.28	6.72	7.4	7.8
	MICROGREEN	MICRO	MICRO_01_02_R	01	02	2014-10-16	20141016	14:00:00	2014-09-17	2014-10-16	0	3	1	4	Ceasar	Seed	Sprig	1	R	660	100	-	-	-	-	Trtmt + GH	C	21	0.94	-	-	2		143150	382660		20141016 21	20141016 21.D	Sample		2014-11-18 13:52:00	4.85	5.16	5.97	6.03	6.28	6.72	7.4	7.8
	MICROGREEN	MICRO	MICRO_01_02_EMPTY	01	02	2014-10-16	20141016	14:00:00	-	-	-	-	-	-	-	-	-	-	EMPTY	-	-	-	-	-	-	-	A	22	1	-	-	2		143150	296382		20141016 22	20141016 22.D	Sample		2014-11-18 14:50:00	4.85	5.16	5.97	6.03	6.28	6.72	7.4	7.8
	MICROGREEN	MICRO	MICRO_01_02_EMPTY	01	02	2014-10-16	20141016	14:00:00	-	-	-	-	-	-	-	-	-	-	EMPTY	-	-	-	-	-	-	-	B	23	1	-	-	2		143150	177483		20141016 23	20141016 23.D	Sample		2014-11-18 15:47:00	4.85	5.16	5.97	6.03	6.28	6.72	7.4	7.8
	MICROGREEN	MICRO	MICRO_01_02_EMPTY	01	02	2014-10-16	20141016	14:00:00	-	-	-	-	-	-	-	-	-	-	EMPTY	-	-	-	-	-	-	-	C	24	1	-	-	2		143150	299767		20141016 24	20141016 24.D	Sample		2014-11-18 16:45:00	4.85	5.16	5.97	6.03	6.28	6.72	7.4	7.8
	MICROGREEN	MICRO	MICRO_01_02_NA	01	02	2014-10-16	20141016	14:00:00	-	-	-	-	-	-	-	-	-	-	NA	-	-	-	-	-	-	-	-	NA	1	-	-	1		143150	143150		20141016 NA	20141016 NA.D	Sample		2014-11-18 17:43:00	4.85	5.16	5.97	6.03	6.28	6.72	7.4	7.8
Two week in GH post germination under treatments. Microgreen production.	MICROGREEN	MICRO	MICRO_01_03_MeCl	01	03	2014-10-23	20141023	12:00:00	-	-	-	-	-	-	-	-	-	-	MeCl	-	-	-	-	-	-	-	-	MeCl	1	-	-	1
	MICROGREEN	MICRO	MICRO_01_03_GH	01	03	2014-10-23	20141023	12:00:00	2014-09-17	2014-10-23	-	-	-	5	Ceasar	Seed	Sprig	1	GH	Sun	-	-	-	-	-	MH + GH	A	1	2.76	-	-	2	Cut off above the node. First true leaf for AOX.	145619	191222		20141023 01	20141023 01.D	Sample		2014-11-18 18:41:00	4.85	5.16	5.97	6.03	6.28	6.72	7.4	7.8
	MICROGREEN	MICRO	MICRO_01_03_GH	01	03	2014-10-23	20141023	12:00:00	2014-09-17	2014-10-23	-	-	-	5	Ceasar	Seed	Sprig	1	GH	Sun	-	-	-	-	-	MH + GH	B	2	2.98	-	-	2		145619	339922		20141023 02	20141023 02.D	Sample		2014-11-18 19:38:00	4.85	5.16	5.97	6.03	6.28	6.72	7.4	7.8
	MICROGREEN	MICRO	MICRO_01_03_GH	01	03	2014-10-23	20141023	12:00:00	2014-09-17	2014-10-23	-	-	-	5	Ceasar	Seed	Sprig	1	GH	Sun	-	-	-	-	-	MH + GH	C	3	3.78	-	-	2		145619	227113		20141023 03	20141023 03.D	Sample		2014-11-18 20:36:00	4.85	5.16	5.97	6.03	6.28	6.72	7.4	7.8
	MICROGREEN	MICRO	MICRO_01_03_R	01	03	2014-10-23	20141023	12:00:00	2014-09-17	2014-10-23	0	3	2	5	Ceasar	Seed	Sprig	1	R	660	100	-	-	-	-	Trtmt + GH	A	4	1.13	-	-	2		145619	244723		20141023 04	20141023 04.D	Sample		2014-11-18 21:34:00	4.85	5.16	5.97	6.03	6.28	6.72	7.4	7.8
	MICROGREEN	MICRO	MICRO_01_03_R	01	03	2014-10-23	20141023	12:00:00	2014-09-17	2014-10-23	0	3	2	5	Ceasar	Seed	Sprig	1	R	660	100	-	-	-	-	Trtmt + GH	B	5	2.14	-	-	2		145619	227230		20141023 05	20141023 05.D	Sample		2014-11-18 22:31:00	4.85	5.16	5.97	6.03	6.28	6.72	7.4	7.8
	MICROGREEN	MICRO	MICRO_01_03_R	01	03	2014-10-23	20141023	12:00:00	2014-09-17	2014-10-23	0	3	2	5	Ceasar	Seed	Sprig	1	R	660	100	-	-	-	-	Trtmt + GH	C	6	1.44	-	-	2		145619	275712		20141023 06	20141023 06.D	Sample		2014-11-18 23:29:00	4.85	5.16	5.97	6.03	6.28	6.72	7.4	7.8
	MICROGREEN	MICRO	MICRO_01_03_B	01	03	2014-10-23	20141023	12:00:00	2014-09-17	2014-10-23	0	3	2	5	Ceasar	Seed	Sprig	1	B	470	100	-	-	-	-	Trtmt + GH	A	7	1.56	-	-	2		145619	236015		20141023 07	20141023 07.D	Sample		2014-11-19 00:27:00	4.85	5.16	5.97	6.03	6.28	6.72	7.4	7.8
	MICROGREEN	MICRO	MICRO_01_03_B	01	03	2014-10-23	20141023	12:00:00	2014-09-17	2014-10-23	0	3	2	5	Ceasar	Seed	Sprig	1	B	470	100	-	-	-	-	Trtmt + GH	B	8	1.26	-	-	2		145619	317758		20141023 08	20141023 08.D	Sample		2014-11-19 01:24:00	4.85	5.16	5.97	6.03	6.28	6.72	7.4	7.8
	MICROGREEN	MICRO	MICRO_01_03_B	01	03	2014-10-23	20141023	12:00:00	2014-09-17	2014-10-23	0	3	2	5	Ceasar	Seed	Sprig	1	B	470	100	-	-	-	-	Trtmt + GH	C	9	1.61	-	-	2		145619	289386		20141023 09	20141023 09.D	Sample		2014-11-19 02:22:00	4.85	5.16	5.97	6.03	6.28	6.72	7.4	7.8
	MICROGREEN	MICRO	MICRO_01_03_RB	01	03	2014-10-23	20141023	12:00:00	2014-09-17	2014-10-23	0	3	2	5	Ceasar	Seed	Sprig	1	RB	660	50	470	50	-	-	Trtmt + GH	A	10	2.09	-	-	2		145619	220916		20141023 10	20141023 10.D	Sample		2014-11-19 03:19:00	4.85	5.16	5.97	6.03	6.28	6.72	7.4	7.8
	MICROGREEN	MICRO	MICRO_01_03_RB	01	03	2014-10-23	20141023	12:00:00	2014-09-17	2014-10-23	0	3	2	5	Ceasar	Seed	Sprig	1	RB	660	50	470	50	-	-	Trtmt + GH	B	11	1.84	-	-	2		145619	170270		20141023 11	20141023 11.D	Sample		2014-11-19 04:17:00	4.85	5.16	5.97	6.03	6.28	6.72	7.4	7.8
	MICROGREEN	MICRO	MICRO_01_03_RB	01	03	2014-10-23	20141023	12:00:00	2014-09-17	2014-10-23	0	3	2	5	Ceasar	Seed	Sprig	1	RB	660	50	470	50	-	-	Trtmt + GH	C	12	1.36	-	-	2		145619	201513		20141023 12	20141023 12.D	Sample		2014-11-19 05:15:00	4.85	5.16	5.97	6.03	6.28	6.72	7.4	7.8
	MICROGREEN	MICRO	MICRO_01_03_RBFr	01	03	2014-10-23	20141023	12:00:00	2014-09-17	2014-10-23	0	3	2	5	Ceasar	Seed	Sprig	1	RBFr	660	50	470	50	730	50	Trtmt + GH	A	13	0.78	-	-	2		145619	206606		20141023 13	20141023 13.D	Sample		2014-11-19 06:12:00	4.85	5.16	5.97	6.03	6.28	6.72	7.4	7.8
	MICROGREEN	MICRO	MICRO_01_03_RBFr	01	03	2014-10-23	20141023	12:00:00	2014-09-17	2014-10-23	0	3	2	5	Ceasar	Seed	Sprig	1	RBFr	660	50	470	50	730	50	Trtmt + GH	B	14	2.62	-	-	2		145619	183323		20141023 14	20141023 14.D	Sample		2014-11-19 07:10:00	4.85	5.16	5.97	6.03	6.28	6.72	7.4	7.8
	MICROGREEN	MICRO	MICRO_01_03_RBFr	01	03	2014-10-23	20141023	12:00:00	2014-09-17	2014-10-23	0	3	2	5	Ceasar	Seed	Sprig	1	RBFr	660	50	470	50	730	50	Trtmt + GH	C	15	3.03	-	-	2		145619	165308		20141023 15	20141023 15.D	Sample		2014-11-19 08:08:00	4.85	5.16	5.97	6.03	6.28	6.72	7.4	7.8
	MICROGREEN	MICRO	MICRO_01_03_RBY	01	03	2014-10-23	20141023	12:00:00	2014-09-17	2014-10-23	0	3	2	5	Ceasar	Seed	Sprig	1	RBY	660	50	470	50	580	50	Trtmt + GH	A	16	2.65	-	-	2		145619	211760		20141023 16	20141023 16.D	Sample		2014-11-19 09:05:00	4.85	5.16	5.97	6.03	6.28	6.72	7.4	7.8
	MICROGREEN	MICRO	MICRO_01_03_RBY	01	03	2014-10-23	20141023	12:00:00	2014-09-17	2014-10-23	0	3	2	5	Ceasar	Seed	Sprig	1	RBY	660	50	470	50	580	50	Trtmt + GH	B	17	4.05	-	-	2		145619	236207		20141023 17	20141023 17.D	Sample		2014-11-19 10:03:00	4.85	5.16	5.97	6.03	6.28	6.72	7.4	7.8
	MICROGREEN	MICRO	MICRO_01_03_RBY	01	03	2014-10-23	20141023	12:00:00	2014-09-17	2014-10-23	0	3	2	5	Ceasar	Seed	Sprig	1	RBY	660	50	470	50	580	50	Trtmt + GH	C	18	3.45	-	-	2		145619	204594		20141023 18	20141023 18.D	Sample		2014-11-19 11:01:00	4.85	5.16	5.97	6.03	6.28	6.72	7.4	7.8
	MICROGREEN	MICRO	MICRO_01_03_RBG	01	03	2014-10-23	20141023	12:00:00	2014-09-17	2014-10-23	0	3	2	5	Ceasar	Seed	Sprig	1	RBG	660	50	470	50	525	50	Trtmt + GH	A	19	2.7	-	-	2		145619	178972		20141023 19	20141023 19.D	Sample		2014-11-19 11:59:00	4.85	5.16	5.97	6.03	6.28	6.72	7.4	7.8
	MICROGREEN	MICRO	MICRO_01_03_RBG	01	03	2014-10-23	20141023	12:00:00	2014-09-17	2014-10-23	0	3	2	5	Ceasar	Seed	Sprig	1	RBG	660	50	470	50	525	50	Trtmt + GH	B	20	1.98	-	-	2		145619	128246		20141023 20	20141023 20.D	Sample		2014-11-19 12:57:00	4.85	5.16	5.97	6.03	6.28	6.72	7.4	7.8
	MICROGREEN	MICRO	MICRO_01_03_RBG	01	03	2014-10-23	20141023	12:00:00	2014-09-17	2014-10-23	0	3	2	5	Ceasar	Seed	Sprig	1	RBG	660	50	470	50	525	50	Trtmt + GH	C	21	1.91	-	-	2		145619	332901		20141023 21	20141023 21.D	Sample		2014-11-19 13:55:00	4.85	5.16	5.97	6.03	6.28	6.72	7.4	7.8
	MICROGREEN	MICRO	MICRO_01_03_EMPTY	01	03	2014-10-23	20141023	12:00:00	-	-	-	-	-	-	-	-	-	-	EMPTY	-	-	-	-	-	-	-	A	22	1	-	-	2		145619	184069		20141023 22	20141023 22.D	Sample		2014-11-19 14:53:00	4.85	5.16	5.97	6.03	6.28	6.72	7.4	7.8
	MICROGREEN	MICRO	MICRO_01_03_EMPTY	01	03	2014-10-23	20141023	12:00:00	-	-	-	-	-	-	-	-	-	-	EMPTY	-	-	-	-	-	-	-	B	23	1	-	-	2		145619	248074		20141023 23	20141023 23.D	Sample		2014-11-19 15:51:00	4.85	5.16	5.97	6.03	6.28	6.72	7.4	7.8
	MICROGREEN	MICRO	MICRO_01_03_EMPTY	01	03	2014-10-23	20141023	12:00:00	-	-	-	-	-	-	-	-	-	-	EMPTY	-	-	-	-	-	-	-	C	24	1	-	-	2		145619	145110		20141023 24	20141023 24.D	Sample		2014-11-19 16:49:00	4.85	5.16	5.97	6.03	6.28	6.72	7.4	7.8
	MICROGREEN	MICRO	MICRO_01_03_NA	01	03	2014-10-23	20141023	12:00:00	-	-	-	-	-	-	-	-	-	-	NA	-	-	-	-	-	-	-	-	NA	1	-	-	1		145619	145619		20141023 NA	20141023 NA.D	Sample		2014-11-19 17:47:00	4.85	5.16	5.97	6.03	6.28	6.72	7.4	7.8
Germination under treatments. Microgreen production.	MICROGREEN	MICRO	MICRO_02_01_MeCl	02	01	2015-01-07	20150107	13:00:00	-	-	-	-	-	-	-	-	-	-	MeCl	-	-	-	-	-	-	-	-	MeCl	1	-	-	1		230107	0		MeCl	20150107 MeCl.D	Sample		2015-01-07 20:08:00	4.85	5.16	5.97	6.03	6.28	6.72	7.4	7.8
	MICROGREEN	MICRO	MICRO_02_01_RB	02	01	2015-01-07	20150107	13:00:00	2014-12-17	2015-01-07	0	3	0	3	Ceasar	Seed	Seedlings	8	RB	660	50	470	50	-	-	Trtmt	A	1	0.98	-	-	2		230107	253005		1	20150107 01.D	Sample		2015-01-07 21:06:00	4.85	5.16	5.97	6.03	6.28	6.72	7.4	7.8
	MICROGREEN	MICRO	MICRO_02_01_RB	02	01	2015-01-07	20150107	13:00:00	2014-12-17	2015-01-07	0	3	0	3	Ceasar	Seed	Seedlings	8	RB	660	50	470	50	-	-	Trtmt	B	2	1.02	-	-	2		230107	299506		2	20150107 02.D	Sample		2015-01-07 22:03:00	4.85	5.16	5.97	6.03	6.28	6.72	7.4	7.8
	MICROGREEN	MICRO	MICRO_02_01_RB	02	01	2015-01-07	20150107	13:00:00	2014-12-17	2015-01-07	0	3	0	3	Ceasar	Seed	Seedlings	8	RB	660	50	470	50	-	-	Trtmt	C	3	0.94	-	-	2		230107	309344		3	20150107 03.D	Sample		2015-01-07 23:01:00	4.85	5.16	5.97	6.03	6.28	6.72	7.4	7.8
	MICROGREEN	MICRO	MICRO_02_01_R	02	01	2015-01-07	20150107	13:00:00	2014-12-17	2015-01-07	0	3	0	3	Ceasar	Seed	Seedlings	11	R	660	100	-	-	-	-	Trtmt	A	4	0.92	-	-	2		230107	291035		4	20150107 04.D	Sample		2015-01-07 23:59:00	4.85	5.16	5.97	6.03	6.28	6.72	7.4	7.8
	MICROGREEN	MICRO	MICRO_02_01_R	02	01	2015-01-07	20150107	13:00:00	2014-12-17	2015-01-07	0	3	0	3	Ceasar	Seed	Seedlings	11	R	660	100	-	-	-	-	Trtmt	B	5	0.95	-	-	2		230107	323584		5	20150107 05.D	Sample		2015-01-08 00:57:00	4.85	5.16	5.97	6.03	6.28	6.72	7.4	7.8
	MICROGREEN	MICRO	MICRO_02_01_R	02	01	2015-01-07	20150107	13:00:00	2014-12-17	2015-01-07	0	3	0	3	Ceasar	Seed	Seedlings	11	R	660	100	-	-	-	-	Trtmt	C	6	0.96	-	-	2		230107	324583		6	20150107 06.D	Sample		2015-01-08 01:54:00	4.85	5.16	5.97	6.03	6.28	6.72	7.4	7.8
	MICROGREEN	MICRO	MICRO_02_01_B	02	01	2015-01-07	20150107	13:00:00	2014-12-17	2015-01-07	0	3	0	3	Ceasar	Seed	Seedlings	8	B	470	100	-	-	-	-	Trtmt	A	7	1.05	-	-	2		230107	276707		7	20150107 07.D	Sample		2015-01-08 02:52:00	4.85	5.16	5.97	6.03	6.28	6.72	7.4	7.8
	MICROGREEN	MICRO	MICRO_02_01_B	02	01	2015-01-07	20150107	13:00:00	2014-12-17	2015-01-07	0	3	0	3	Ceasar	Seed	Seedlings	8	B	470	100	-	-	-	-	Trtmt	B	8	1.01	-	-	2		230107	275700		8	20150107 08.D	Sample		2015-01-08 03:50:00	4.85	5.16	5.97	6.03	6.28	6.72	7.4	7.8
	MICROGREEN	MICRO	MICRO_02_01_B	02	01	2015-01-07	20150107	13:00:00	2014-12-17	2015-01-07	0	3	0	3	Ceasar	Seed	Seedlings	8	B	470	100	-	-	-	-	Trtmt	C	9	0.91	-	-	2		230107	218666		9	20150107 09.D	Sample		2015-01-08 04:47:00	4.85	5.16	5.97	6.03	6.28	6.72	7.4	7.8
	MICROGREEN	MICRO	MICRO_02_01_RBG	02	01	2015-01-07	20150107	13:00:00	2014-12-17	2015-01-07	0	3	0	3	Ceasar	Seed	Seedlings	6	RBG	660	50	470	50	525	50	Trtmt	A	10	1.66	-	-	2		230107	512833		10	20150107 10.D	Sample		2015-01-08 05:45:00	4.85	5.16	5.97	6.03	6.28	6.72	7.4	7.8
	MICROGREEN	MICRO	MICRO_02_01_RBG	02	01	2015-01-07	20150107	13:00:00	2014-12-17	2015-01-07	0	3	0	3	Ceasar	Seed	Seedlings	6	RBG	660	50	470	50	525	50	Trtmt	B	11	1.66	-	-	2		230107	390892		11	20150107 11.D	Sample		2015-01-08 06:43:00	4.85	5.16	5.97	6.03	6.28	6.72	7.4	7.8
	MICROGREEN	MICRO	MICRO_02_01_RBG	02	01	2015-01-07	20150107	13:00:00	2014-12-17	2015-01-07	0	3	0	3	Ceasar	Seed	Seedlings	6	RBG	660	50	470	50	525	50	Trtmt	C	12	1.56	-	-	2		230107	288849		12	20150107 12.D	Sample		2015-01-08 07:41:00	4.85	5.16	5.97	6.03	6.28	6.72	7.4	7.8
	MICROGREEN	MICRO	MICRO_02_01_RBY	02	01	2015-01-07	20150107	13:00:00	2014-12-17	2015-01-07	0	3	0	3	Ceasar	Seed	Seedlings	6	RBY	660	50	470	50	580	50	Trtmt	A	13	1.35	-	-	2		230107	347213		13	20150107 13.D	Sample		2015-01-08 08:38:00	4.85	5.16	5.97	6.03	6.28	6.72	7.4	7.8
	MICROGREEN	MICRO	MICRO_02_01_RBY	02	01	2015-01-07	20150107	13:00:00	2014-12-17	2015-01-07	0	3	0	3	Ceasar	Seed	Seedlings	6	RBY	660	50	470	50	580	50	Trtmt	B	14	1.29	-	-	2		230107	413806		14	20150107 14.D	Sample		2015-01-08 09:36:00	4.85	5.16	5.97	6.03	6.28	6.72	7.4	7.8
	MICROGREEN	MICRO	MICRO_02_01_RBY	02	01	2015-01-07	20150107	13:00:00	2014-12-17	2015-01-07	0	3	0	3	Ceasar	Seed	Seedlings	6	RBY	660	50	470	50	580	50	Trtmt	C	15	1.18	-	-	2		230107	448611		15	20150107 15.D	Sample		2015-01-08 10:34:00	4.85	5.16	5.97	6.03	6.28	6.72	7.4	7.8
	MICROGREEN	MICRO	MICRO_02_01_RBFr	02	01	2015-01-07	20150107	13:00:00	2014-12-17	2015-01-07	0	3	0	3	Ceasar	Seed	Seedlings	6	RBFr	660	50	470	50	730	50	Trtmt	A	16	1.36	-	-	2		230107	413767		16	20150107 16.D	Sample		2015-01-08 11:32:00	4.85	5.16	5.97	6.03	6.28	6.72	7.4	7.8
	MICROGREEN	MICRO	MICRO_02_01_RBFr	02	01	2015-01-07	20150107	13:00:00	2014-12-17	2015-01-07	0	3	0	3	Ceasar	Seed	Seedlings	6	RBFr	660	50	470	50	730	50	Trtmt	B	17	1.53	-	-	2		230107	407037		17	20150107 17.D	Sample		2015-01-08 12:29:00	4.85	5.16	5.97	6.03	6.28	6.72	7.4	7.8
	MICROGREEN	MICRO	MICRO_02_01_RBFr	02	01	2015-01-07	20150107	13:00:00	2014-12-17	2015-01-07	0	3	0	3	Ceasar	Seed	Seedlings	6	RBFr	660	50	470	50	730	50	Trtmt	C	18	1.59	-	-	2		230107	397859		18	20150107 18.D	Sample		2015-01-08 13:27:00	4.85	5.16	5.97	6.03	6.28	6.72	7.4	7.8
	MICROGREEN	MICRO	MICRO_02_01_GH	02	01	2015-01-07	20150107	13:00:00	2014-12-17	2015-01-07	-	-	-	3	Ceasar	Seed	Seedlings	8	GH	Sun	-	-	-	-	-	MH + GH	A	19	1.24	-	-	2		230107	461518		19	20150107 19.D	Sample		2015-01-08 14:25:00	4.85	5.16	5.97	6.03	6.28	6.72	7.4	7.8
	MICROGREEN	MICRO	MICRO_02_01_GH	02	01	2015-01-07	20150107	13:00:00	2014-12-17	2015-01-07	-	-	-	3	Ceasar	Seed	Seedlings	8	GH	Sun	-	-	-	-	-	MH + GH	B	20	1.2	-	-	2		230107	345522		20	20150107 20.D	Sample		2015-01-08 15:23:00	4.85	5.16	5.97	6.03	6.28	6.72	7.4	7.8
	MICROGREEN	MICRO	MICRO_02_01_GH	02	01	2015-01-07	20150107	13:00:00	2014-12-17	2015-01-07	-	-	-	3	Ceasar	Seed	Seedlings	8	GH	Sun	-	-	-	-	-	MH + GH	C	21	1.23	-	-	2		230107	452975		21	20150107 21.D	Sample		2015-01-08 16:20:00	4.85	5.16	5.97	6.03	6.28	6.72	7.4	7.8
	MICROGREEN	MICRO	MICRO_02_01_EMPTY	02	01	2015-01-07	20150107	13:00:00	-	-	-	-	-	-	-	-	-	-	EMPTY	-	-	-	-	-	-	-	A	22	1	-	-	2		230107	457868		22	20150107 22.D	Sample		2015-01-08 17:18:00	4.85	5.16	5.97	6.03	6.28	6.72	7.4	7.8
	MICROGREEN	MICRO	MICRO_02_01_EMPTY	02	01	2015-01-07	20150107	13:00:00	-	-	-	-	-	-	-	-	-	-	EMPTY	-	-	-	-	-	-	-	B	23	1	-	-	2		230107	290518		23	20150107 23.D	Sample		2015-01-08 18:16:00	4.85	5.16	5.97	6.03	6.28	6.72	7.4	7.8
	MICROGREEN	MICRO	MICRO_02_01_EMPTY	02	01	2015-01-07	20150107	13:00:00	-	-	-	-	-	-	-	-	-	-	EMPTY	-	-	-	-	-	-	-	C	24	1	-	-	2		230107	424338		24	20150107 24.D	Sample		2015-01-08 19:13:00	4.85	5.16	5.97	6.03	6.28	6.72	7.4	7.8
	MICROGREEN	MICRO	MICRO_02_01_NA	02	01	2015-01-07	20150107	13:00:00	-	-	-	-	-	-	-	-	-	-	NA	-	-	-	-	-	-	-	-	NA	1	-	-	1		230107	230107		20150107 NA STD	20150107 NA STD.D	Sample		2015-01-08 20:11:00	4.85	5.16	5.97	6.03	6.28	6.72	7.4	7.8
One week in GH post germination under treatments. Microgreen production.	MICROGREEN	MICRO	MICRO_02_02_MeCl	02	02	2015-01-15	20150115	13:00:00	-	-	-	-	-	-	-	-	-	-	MeCl	-	-	-	-	-	-	-	-	MeCl	1	-	-	1		250494	0		MeCl	20150115 MeCl.D	Sample		2015-01-15 16:52:00	4.85	5.16	5.97	6.03	6.28	6.72	7.4	7.8
	MICROGREEN	MICRO	MICRO_02_02_GH	02	02	2015-01-15	20150115	13:00:00	2014-12-17	2015-01-15	-	-	-	4	Ceasar	Seed	Sprig	1	GH	Sun	-	-	-	-	-	Trtmt + GH	A	1	0.61	-	-	2		250494	332281		1	20150115 01.D	Sample		2015-01-15 17:50:00	4.85	5.16	5.97	6.03	6.28	6.72	7.4	7.8
	MICROGREEN	MICRO	MICRO_02_02_GH	02	02	2015-01-15	20150115	13:00:00	2014-12-17	2015-01-15	-	-	-	4	Ceasar	Seed	Sprig	1	GH	Sun	-	-	-	-	-	Trtmt + GH	B	2	0.61	-	-	2		250494	362644		2	20150115 02.D	Sample		2015-01-15 18:49:00	4.85	5.16	5.97	6.03	6.28	6.72	7.4	7.8
	MICROGREEN	MICRO	MICRO_02_02_GH	02	02	2015-01-15	20150115	13:00:00	2014-12-17	2015-01-15	-	-	-	4	Ceasar	Seed	Sprig	1	GH	Sun	-	-	-	-	-	Trtmt + GH	C	3	0.56	-	-	2		250494	338444		3	20150115 03.D	Sample		2015-01-15 19:47:00	4.85	5.16	5.97	6.03	6.28	6.72	7.4	7.8
	MICROGREEN	MICRO	MICRO_02_02_B	02	02	2015-01-15	20150115	13:00:00	2014-12-17	2015-01-15	0	3	1	4	Ceasar	Seed	Sprig	1	B	470	100	-	-	-	-	Trtmt + GH	A	4	0.61	-	-	2		250494	393745		4	20150115 04.D	Sample		2015-01-15 20:45:00	4.85	5.16	5.97	6.03	6.28	6.72	7.4	7.8
	MICROGREEN	MICRO	MICRO_02_02_B	02	02	2015-01-15	20150115	13:00:00	2014-12-17	2015-01-15	0	3	1	4	Ceasar	Seed	Sprig	1	B	470	100	-	-	-	-	Trtmt + GH	B	5	0.62	-	-	2		250494	353202		5	20150115 05.D	Sample		2015-01-15 21:43:00	4.85	5.16	5.97	6.03	6.28	6.72	7.4	7.8
	MICROGREEN	MICRO	MICRO_02_02_B	02	02	2015-01-15	20150115	13:00:00	2014-12-17	2015-01-15	0	3	1	4	Ceasar	Seed	Sprig	1	B	470	100	-	-	-	-	Trtmt + GH	C	6	0.58	-	-	2		250494	364861		6	20150115 06.D	Sample		2015-01-15 22:41:00	4.85	5.16	5.97	6.03	6.28	6.72	7.4	7.8
	MICROGREEN	MICRO	MICRO_02_02_RB	02	02	2015-01-15	20150115	13:00:00	2014-12-17	2015-01-15	0	3	1	4	Ceasar	Seed	Sprig	1	RB	660	50	470	50	-	-	Trtmt + GH	A	7	0.78	-	-	2		250494	425668		7	20150115 07.D	Sample		2015-01-15 23:40:00	4.85	5.16	5.97	6.03	6.28	6.72	7.4	7.8
	MICROGREEN	MICRO	MICRO_02_02_RB	02	02	2015-01-15	20150115	13:00:00	2014-12-17	2015-01-15	0	3	1	4	Ceasar	Seed	Sprig	1	RB	660	50	470	50	-	-	Trtmt + GH	B	8	0.78	-	-	2		250494	363313		8	20150115 08.D	Sample		2015-01-16 00:38:00	4.85	5.16	5.97	6.03	6.28	6.72	7.4	7.8
	MICROGREEN	MICRO	MICRO_02_02_RB	02	02	2015-01-15	20150115	13:00:00	2014-12-17	2015-01-15	0	3	1	4	Ceasar	Seed	Sprig	1	RB	660	50	470	50	-	-	Trtmt + GH	C	9	0.59	-	-	2		250494	380914		9	20150115 09.D	Sample		2015-01-16 01:36:00	4.85	5.16	5.97	6.03	6.28	6.72	7.4	7.8
	MICROGREEN	MICRO	MICRO_02_02_RBFr	02	02	2015-01-15	20150115	13:00:00	2014-12-17	2015-01-15	0	3	1	4	Ceasar	Seed	Sprig	1	RBFr	660	50	470	50	730	50	Trtmt + GH	A	10	0.83	-	-	2		250494	386863		10	20150115 10.D	Sample		2015-01-16 02:34:00	4.85	5.16	5.97	6.03	6.28	6.72	7.4	7.8
	MICROGREEN	MICRO	MICRO_02_02_RBFr	02	02	2015-01-15	20150115	13:00:00	2014-12-17	2015-01-15	0	3	1	4	Ceasar	Seed	Sprig	1	RBFr	660	50	470	50	730	50	Trtmt + GH	B	11	0.89	-	-	2		250494	415692		11	20150115 11.D	Sample		2015-01-16 03:32:00	4.85	5.16	5.97	6.03	6.28	6.72	7.4	7.8
	MICROGREEN	MICRO	MICRO_02_02_RBFr	02	02	2015-01-15	20150115	13:00:00	2014-12-17	2015-01-15	0	3	1	4	Ceasar	Seed	Sprig	1	RBFr	660	50	470	50	730	50	Trtmt + GH	C	12	0.79	-	-	2		250494	362194		12	20150115 12.D	Sample		2015-01-16 04:30:00	4.85	5.16	5.97	6.03	6.28	6.72	7.4	7.8
	MICROGREEN	MICRO	MICRO_02_02_RBY	02	02	2015-01-15	20150115	13:00:00	2014-12-17	2015-01-15	0	3	1	4	Ceasar	Seed	Sprig	1	RBY	660	50	470	50	580	50	Trtmt + GH	A	13	1.01	-	-	2		250494	406780		13	20150115 13.D	Sample		2015-01-16 05:29:00	4.85	5.16	5.97	6.03	6.28	6.72	7.4	7.8
	MICROGREEN	MICRO	MICRO_02_02_RBY	02	02	2015-01-15	20150115	13:00:00	2014-12-17	2015-01-15	0	3	1	4	Ceasar	Seed	Sprig	1	RBY	660	50	470	50	580	50	Trtmt + GH	B	14	0.91	-	-	2		250494	357930		14	20150115 14.D	Sample		2015-01-16 06:27:00	4.85	5.16	5.97	6.03	6.28	6.72	7.4	7.8
	MICROGREEN	MICRO	MICRO_02_02_RBY	02	02	2015-01-15	20150115	13:00:00	2014-12-17	2015-01-15	0	3	1	4	Ceasar	Seed	Sprig	1	RBY	660	50	470	50	580	50	Trtmt + GH	C	15	0.91	-	-	2		250494	394877		15	20150115 15.D	Sample		2015-01-16 07:25:00	4.85	5.16	5.97	6.03	6.28	6.72	7.4	7.8
	MICROGREEN	MICRO	MICRO_02_02_RBG	02	02	2015-01-15	20150115	13:00:00	2014-12-17	2015-01-15	0	3	1	4	Ceasar	Seed	Sprig	1	RBG	660	50	470	50	525	50	Trtmt + GH	A	16	0.97	-	-	2		250494	357364		16	20150115 16.D	Sample		2015-01-16 08:23:00	4.85	5.16	5.97	6.03	6.28	6.72	7.4	7.8
	MICROGREEN	MICRO	MICRO_02_02_RBG	02	02	2015-01-15	20150115	13:00:00	2014-12-17	2015-01-15	0	3	1	4	Ceasar	Seed	Sprig	1	RBG	660	50	470	50	525	50	Trtmt + GH	B	17	1.02	-	-	2		250494	375068		17	20150115 17.D	Sample		2015-01-16 09:21:00	4.85	5.16	5.97	6.03	6.28	6.72	7.4	7.8
	MICROGREEN	MICRO	MICRO_02_02_RBG	02	02	2015-01-15	20150115	13:00:00	2014-12-17	2015-01-15	0	3	1	4	Ceasar	Seed	Sprig	1	RBG	660	50	470	50	525	50	Trtmt + GH	C	18	0.84	-	-	2		250494	411210		18	20150115 18.D	Sample		2015-01-16 10:20:00	4.85	5.16	5.97	6.03	6.28	6.72	7.4	7.8
	MICROGREEN	MICRO	MICRO_02_02_EMPTY	02	02	2015-01-15	20150115	13:00:00	-	-	-	-	-	-	-	-	-	-	EMPTY	-	-	-	-	-	-	-	A	19	1	-	-	2		250494	355402		19	20150115 19.D	Sample		2015-01-16 11:18:00	4.85	5.16	5.97	6.03	6.28	6.72	7.4	7.8
	MICROGREEN	MICRO	MICRO_02_02_EMPTY	02	02	2015-01-15	20150115	13:00:00	-	-	-	-	-	-	-	-	-	-	EMPTY	-	-	-	-	-	-	-	B	20	1	-	-	2		250494	577367		20	20150115 20.D	Sample		2015-01-16 12:16:00	4.85	5.16	5.97	6.03	6.28	6.72	7.4	7.8
	MICROGREEN	MICRO	MICRO_02_02_EMPTY	02	02	2015-01-15	20150115	13:00:00	-	-	-	-	-	-	-	-	-	-	EMPTY	-	-	-	-	-	-	-	C	21	1	-	-	2		250494	283255		21	20150115 21.D	Sample		2015-01-16 13:15:00	4.85	5.16	5.97	6.03	6.28	6.72	7.4	7.8
	MICROGREEN	MICRO	MICRO_02_02_NA	02	02	2015-01-15	20150115	13:00:00	-	-	-	-	-	-	-	-	-	-	NA	-	-	-	-	-	-	-	-	NA	1	-	-	1		250494	250494		20150115 NA	20150115 NA.D	Sample		2015-01-16 14:13:00	4.85	5.16	5.97	6.03	6.28	6.72	7.4	7.8
[truncated: 424 more columns]
